# Supplementary material
Source: PubMed Central journal article supplement (PMC4554858)
Supplement: ajas-28-10-1496-supple.pdf [file ajas-28-10-1496-supple.pdf]

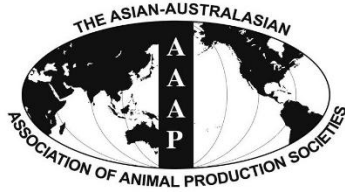

## RNA-seq Profiles of Immune Related Genes in the Spleen of Necrotic Enteritis-afflicted Chicken Lines

Anh Duc Truong, Yeong Ho Hong\*, and Hyun S. Lillehoj<sup>1</sup>

Department of Animal Science and Technology, Chung-Ang University, Anseong 456-756, Korea

### - Supplementary Data -

#### TABLE OF CONTENTS

##### *Supplementary Tables*

|                              |    |
|------------------------------|----|
| Supplementary Table S1 ..... | 2  |
| Supplementary Table S2 ..... | 13 |
| Supplementary Table S3 ..... | 15 |
| Supplementary Table S4 ..... | 18 |
| Supplementary Table S5 ..... | 22 |

##### *Supplementary Figure*

|                               |    |
|-------------------------------|----|
| Supplementary Figure S1 ..... | 24 |
| Supplementary Figure S2 ..... | 25 |

#### Sequence data availability

All raw Illumina sequence data can be obtained freely by contacting the Department of Animal Science and Technology. The AMG\_Gallus database has been uploaded in the National Agricultural Biotechnology Information Center (NABIC, <http://nabic.rda.go.kr/>) [ID: NN-0915-000001 and NN-0915-000002].

**Supplementary Table S1a.** Gene ontology enrichment test in the spleen of resistant chicken line 6.3 with  $p < 0.05$  and Log2-transformations of the normalization  $\geq 2$  (MF: molecular function, BP: biological process and CC: cellular component). The data showed the number of genes which were up- and downregulated in resistant chicken line 6.3.

| ACC        | Category | Definition                                                                                            | Regulated gene |      | p-value     |
|------------|----------|-------------------------------------------------------------------------------------------------------|----------------|------|-------------|
|            |          |                                                                                                       | Up             | Down |             |
| GO:0043169 | MF       | cation binding                                                                                        | 13             | 4    | 6.14E-05    |
| GO:0043167 | MF       | ion binding                                                                                           | 13             | 4    | 6.27E-05    |
| GO:0046872 | MF       | metal ion binding                                                                                     | 12             | 4    | 0.000196789 |
| GO:0008237 | MF       | metallopeptidase activity                                                                             | 3              | 1    | 0.000268084 |
| GO:0004089 | MF       | carbonate dehydratase activity                                                                        | 2              | 0    | 0.000299687 |
| GO:0004222 | MF       | metalloendopeptidase activity                                                                         | 2              | 1    | 0.00082792  |
| GO:0004869 | MF       | cysteine-type endopeptidase inhibitor activity                                                        | 2              | 0    | 0.000947924 |
| GO:0052582 | MF       | (+)-menthofuran synthase activity                                                                     | 1              | 0    | 0.00174286  |
| GO:0043825 | MF       | succinylornithine transaminase activity                                                               | 1              | 0    | 0.00194545  |
| GO:0016705 | MF       | oxidoreductase activity, acting on paired donors, with incorporation or reduction of molecular oxygen | 3              | 0    | 0.00196149  |
| GO:0004026 | MF       | alcohol O-acetyltransferase activity                                                                  | 0              | 1    | 0.0019911   |
| GO:0034318 | MF       | alcohol O-acyltransferase activity                                                                    | 0              | 1    | 0.0019911   |
| GO:0034319 | MF       | alcohol O-butanoyltransferase activity                                                                | 0              | 1    | 0.0019911   |
| GO:0034323 | MF       | O-butanoyltransferase activity                                                                        | 0              | 1    | 0.0019911   |
| GO:0034326 | MF       | butanoyltransferase activity                                                                          | 0              | 1    | 0.0019911   |
| GO:0034338 | MF       | short-chain carboxylesterase activity                                                                 | 0              | 1    | 0.0019911   |
| GO:0016836 | MF       | hydro-lyase activity                                                                                  | 2              | 0    | 0.00296521  |
| GO:0004611 | MF       | phosphoenolpyruvate carboxykinase activity                                                            | 1              | 0    | 0.00343723  |
| GO:0004613 | MF       | phosphoenolpyruvate carboxykinase (GTP) activity                                                      | 1              | 0    | 0.00343723  |
| GO:0005499 | MF       | vitamin D binding                                                                                     | 1              | 0    | 0.0034967   |
| GO:0016829 | MF       | lyase activity                                                                                        | 1              | 1    | 0.00366269  |
| GO:0004566 | MF       | beta-glucuronidase activity                                                                           | 1              | 0    | 0.00397161  |
| GO:0045294 | MF       | alpha-catenin binding                                                                                 | 1              | 0    | 0.00420115  |
| GO:0046914 | MF       | transition metal ion binding                                                                          | 8              | 1    | 0.00445236  |
| GO:0003824 | MF       | catalytic activity                                                                                    | 18             | 10   | 0.00447815  |
| GO:0070011 | MF       | peptidase activity, acting on L-amino acid peptides                                                   | 3              | 2    | 0.00454432  |
| GO:0016835 | MF       | carbon-oxygen lyase activity                                                                          | 2              | 0    | 0.00464331  |
| GO:0005509 | MF       | calcium ion binding                                                                                   | 3              | 2    | 0.00475453  |
| GO:0003674 | MF       | molecular_function                                                                                    | 28             | 7    | 0.00478706  |
| GO:0008743 | MF       | L-threonine 3-dehydrogenase activity                                                                  | 1              | 0    | 0.00482599  |
| GO:0008233 | MF       | peptidase activity                                                                                    | 3              | 2    | 0.0050348   |
| GO:0035529 | MF       | NADH pyrophosphatase activity                                                                         | 1              | 0    | 0.00510374  |
| GO:0070573 | MF       | metalloendopeptidase activity                                                                         | 1              | 0    | 0.0051373   |
| GO:0004668 | MF       | protein-arginine deiminase activity                                                                   | 0              | 1    | 0.00537643  |
| GO:0015204 | MF       | urea transmembrane transporter activity                                                               | 1              | 0    | 0.00548746  |
| GO:0042887 | MF       | amide transmembrane transporter activity                                                              | 1              | 0    | 0.00548746  |
| GO:0005506 | MF       | iron ion binding                                                                                      | 3              | 0    | 0.00550626  |
| GO:0046996 | MF       | oxidoreductase activity, acting on paired donors                                                      | 1              | 0    | 0.0058867   |
| GO:0050046 | MF       | lathosterol oxidase activity                                                                          | 1              | 0    | 0.0058867   |
| GO:0070704 | MF       | sterol desaturase activity                                                                            | 1              | 0    | 0.0058867   |
| GO:0047756 | MF       | chondroitin 4-sulfotransferase activity                                                               | 1              | 0    | 0.00624023  |
| GO:0032217 | MF       | riboflavin transporter activity                                                                       | 1              | 0    | 0.00640645  |
| GO:0004175 | MF       | endopeptidase activity                                                                                | 2              | 2    | 0.00718106  |
| GO:0008239 | MF       | dipeptidyl-peptidase activity                                                                         | 1              | 0    | 0.00731233  |
| GO:0004497 | MF       | monooxygenase activity                                                                                | 2              | 0    | 0.00792078  |
| GO:0005215 | MF       | transporter activity                                                                                  | 5              | 1    | 0.00913711  |
| GO:0004528 | MF       | phosphodiesterase I activity                                                                          | 1              | 0    | 0.00952365  |
| GO:0005184 | MF       | neuropeptide hormone activity                                                                         | 1              | 0    | 0.0108094   |
| GO:0001968 | MF       | fibronectin binding                                                                                   | 0              | 1    | 0.0119692   |
| GO:0016813 | MF       | hydrolase activity, acting on carbon-nitrogen                                                         | 0              | 1    | 0.0141259   |
| GO:0022857 | MF       | transmembrane transporter activity                                                                    | 5              | 0    | 0.014237    |
| GO:0004551 | MF       | nucleotide diphosphatase activity                                                                     | 1              | 0    | 0.0149732   |
| GO:0016805 | MF       | dipeptidase activity                                                                                  | 1              | 0    | 0.0152864   |
| GO:0004866 | MF       | endopeptidase inhibitor activity                                                                      | 2              | 0    | 0.0175173   |
| GO:0061135 | MF       | endopeptidase regulator activity                                                                      | 2              | 0    | 0.0177896   |
| GO:0034481 | MF       | chondroitin sulfotransferase activity                                                                 | 1              | 0    | 0.018335    |
| GO:0009055 | MF       | electron carrier activity                                                                             | 2              | 0    | 0.0185937   |
| GO:0015116 | MF       | sulfate transmembrane transporter activity                                                            | 1              | 0    | 0.0187158   |
| GO:0051183 | MF       | vitamin transporter activity                                                                          | 1              | 0    | 0.0190009   |
| GO:0047429 | MF       | nucleoside-triphosphate diphosphatase activity                                                        | 1              | 0    | 0.0194876   |

| ACC        | Category | Definition                                                                   | Regulated gene |      | p-value     |
|------------|----------|------------------------------------------------------------------------------|----------------|------|-------------|
|            |          |                                                                              | Up             | Down |             |
| GO:0019842 | MF       | vitamin binding                                                              | 2              | 0    | 0.0201883   |
| GO:0043027 | MF       | cysteine-type endopeptidase inhibitor activity involved in apoptotic process | 1              | 0    | 0.0210609   |
| GO:0017171 | MF       | serine hydrolase activity                                                    | 0              | 2    | 0.021913    |
| GO:0020037 | MF       | heme binding                                                                 | 2              | 0    | 0.0225592   |
| GO:0030414 | MF       | peptidase inhibitor activity                                                 | 2              | 0    | 0.0231552   |
| GO:0016787 | MF       | hydrolase activity                                                           | 5              | 4    | 0.0245724   |
| GO:0016491 | MF       | oxidoreductase activity                                                      | 4              | 0    | 0.0252204   |
| GO:0045296 | MF       | cadherin binding                                                             | 1              | 0    | 0.0255924   |
| GO:0046906 | MF       | tetrapyrrole binding                                                         | 2              | 0    | 0.0259168   |
| GO:0061134 | MF       | peptidase regulator activity                                                 | 2              | 0    | 0.029062    |
| GO:0015291 | MF       | secondary active transmembrane transporter activity                          | 2              | 0    | 0.0301934   |
| GO:0016413 | MF       | O-acetyltransferase activity                                                 | 0              | 1    | 0.0309025   |
| GO:0015301 | MF       | anion:anion antiporter activity                                              | 1              | 0    | 0.0311367   |
| GO:0008009 | MF       | chemokine activity                                                           | 0              | 1    | 0.0324486   |
| GO:0043499 | MF       | eukaryotic cell surface binding                                              | 0              | 1    | 0.0332507   |
| GO:0042379 | MF       | chemokine receptor binding                                                   | 0              | 1    | 0.0339999   |
| GO:0005488 | MF       | binding                                                                      | 20             | 5    | 0.0367398   |
| GO:0005328 | MF       | neurotransmitter:sodium symporter activity                                   | 0              | 1    | 0.0373173   |
| GO:0022891 | MF       | substrate-specific transmembrane transporter activity                        | 5              | 0    | 0.0394981   |
| GO:0043028 | MF       | cysteine-type endopeptidase regulator activity involved in apoptotic process | 1              | 0    | 0.0409408   |
| GO:0008483 | MF       | transaminase activity                                                        | 1              | 0    | 0.0418697   |
| GO:0016709 | MF       | oxidoreductase activity, acting on paired donors,                            | 1              | 0    | 0.0433748   |
| GO:0072341 | MF       | modified amino acid binding                                                  | 1              | 0    | 0.0439676   |
| GO:0005326 | MF       | neurotransmitter transporter activity                                        | 0              | 1    | 0.0451888   |
| GO:0004091 | MF       | carboxylesterase activity                                                    | 0              | 1    | 0.0454664   |
| GO:0016769 | MF       | transferase activity, transferring nitrogenous groups                        | 1              | 0    | 0.0469751   |
| GO:0004857 | MF       | enzyme inhibitor activity                                                    | 2              | 0    | 0.0470614   |
| GO:0016831 | MF       | carboxy-lyase activity                                                       | 1              | 0    | 0.0491927   |
| GO:0019752 | BP       | carboxylic acid metabolic process                                            | 4              | 2    | 0.000212763 |
| GO:0043436 | BP       | oxoacid metabolic process                                                    | 4              | 2    | 0.000212763 |
| GO:0006082 | BP       | organic acid metabolic process                                               | 4              | 2    | 0.000217525 |
| GO:0042180 | BP       | cellular ketone metabolic process                                            | 4              | 2    | 0.000253846 |
| GO:0016114 | BP       | terpenoid biosynthetic process                                               | 2              | 0    | 0.000543184 |
| GO:0016054 | BP       | organic acid catabolic process                                               | 2              | 1    | 0.000978565 |
| GO:0046395 | BP       | carboxylic acid catabolic process                                            | 2              | 1    | 0.000978565 |
| GO:0006520 | BP       | cellular amino acid metabolic process                                        | 3              | 1    | 0.00120223  |
| GO:0006721 | BP       | terpenoid metabolic process                                                  | 2              | 0    | 0.00128429  |
| GO:0044282 | BP       | small molecule catabolic process                                             | 2              | 1    | 0.0015781   |
| GO:0008299 | BP       | isoprenoid biosynthetic process                                              | 2              | 0    | 0.00185047  |
| GO:0071705 | BP       | nitrogen compound transport                                                  | 2              | 1    | 0.00190925  |
| GO:0051792 | BP       | medium-chain fatty acid biosynthetic process                                 | 0              | 1    | 0.0019911   |
| GO:0051793 | BP       | medium-chain fatty acid catabolic process                                    | 0              | 1    | 0.0019911   |
| GO:0044106 | BP       | cellular amine metabolic process                                             | 2              | 2    | 0.00220763  |
| GO:0021849 | BP       | neuroblast division in subventricular zone                                   | 1              | 0    | 0.00221879  |
| GO:0030860 | BP       | regulation of polarized epithelial cell differentiation                      | 1              | 0    | 0.00221879  |
| GO:0030862 | BP       | positive regulation of polarized epithelial cell differentiation             | 1              | 0    | 0.00221879  |
| GO:0009063 | BP       | cellular amino acid catabolic process                                        | 2              | 0    | 0.00279384  |
| GO:0006720 | BP       | isoprenoid metabolic process                                                 | 2              | 0    | 0.00354996  |
| GO:0019087 | BP       | transformation of host cell by virus                                         | 0              | 1    | 0.00358255  |
| GO:0006105 | BP       | succinate metabolic process                                                  | 1              | 0    | 0.0036492   |
| GO:0019545 | BP       | arginine catabolic process to succinate                                      | 1              | 0    | 0.0036492   |
| GO:0009308 | BP       | amine metabolic process                                                      | 2              | 3    | 0.00385351  |
| GO:0051791 | BP       | medium-chain fatty acid metabolic process                                    | 0              | 1    | 0.00395518  |
| GO:0021873 | BP       | forebrain neuroblast division                                                | 1              | 0    | 0.00417217  |
| GO:0009310 | BP       | amine catabolic process                                                      | 2              | 0    | 0.00424347  |
| GO:0006567 | BP       | threonine catabolic process                                                  | 1              | 0    | 0.00482599  |
| GO:0019518 | BP       | L-threonine catabolic process to glycine                                     | 1              | 0    | 0.00482599  |
| GO:0050667 | BP       | homocysteine metabolic process                                               | 1              | 0    | 0.00527964  |
| GO:0000052 | BP       | citrulline metabolic process                                                 | 0              | 1    | 0.00537643  |
| GO:0018101 | BP       | peptidyl-citrulline biosynthetic process from peptidyl-arginine              | 0              | 1    | 0.00537643  |
| GO:0019240 | BP       | citrulline biosynthetic process                                              | 0              | 1    | 0.00537643  |
| GO:0071918 | BP       | urea transmembrane transport                                                 | 1              | 0    | 0.00548746  |
| GO:0015816 | BP       | glycine transport                                                            | 0              | 1    | 0.00553173  |
| GO:0071460 | BP       | cellular response to cell-matrix adhesion                                    | 0              | 1    | 0.00555438  |
| GO:0071404 | BP       | cellular response to low-density lipoprotein particle stimulus               | 0              | 1    | 0.00577902  |

| ACC                        | Category | Definition                                                                                   | Regulated gene |      | p-value    |
|----------------------------|----------|----------------------------------------------------------------------------------------------|----------------|------|------------|
|                            |          |                                                                                              | Up             | Down |            |
| <a href="#">GO:0043627</a> | BP       | response to estrogen stimulus                                                                | 0              | 2    | 0.00613608 |
| <a href="#">GO:0032218</a> | BP       | riboflavin transport                                                                         | 0              | 1    | 0.00640645 |
| <a href="#">GO:0009068</a> | BP       | aspartate family amino acid catabolic process                                                | 0              | 1    | 0.00650831 |
| <a href="#">GO:0016053</a> | BP       | organic acid biosynthetic process                                                            | 1              | 2    | 0.00653598 |
| <a href="#">GO:0046394</a> | BP       | carboxylic acid biosynthetic process                                                         | 1              | 2    | 0.00653598 |
| <a href="#">GO:0030859</a> | BP       | polarized epithelial cell differentiation                                                    | 1              | 0    | 0.00681453 |
| <a href="#">GO:0032328</a> | BP       | alanine transport                                                                            | 0              | 1    | 0.0070819  |
| <a href="#">GO:0008150</a> | BP       | biological_process                                                                           | 26             | 8    | 0.00731891 |
| <a href="#">GO:0071402</a> | BP       | cellular response to lipoprotein particle stimulus                                           | 0              | 1    | 0.00777455 |
| <a href="#">GO:0055098</a> | BP       | response to low-density lipoprotein particle stimulus                                        | 0              | 1    | 0.00821599 |
| <a href="#">GO:0015840</a> | BP       | urea transport                                                                               | 1              | 0    | 0.00867569 |
| <a href="#">GO:0006527</a> | BP       | arginine catabolic process                                                                   | 1              | 0    | 0.00872043 |
| <a href="#">GO:0006566</a> | BP       | threonine metabolic process                                                                  | 1              | 0    | 0.00882713 |
| <a href="#">GO:0044281</a> | BP       | small molecule metabolic process                                                             | 6              | 2    | 0.00909546 |
| <a href="#">GO:0015824</a> | BP       | proline transport                                                                            | 0              | 1    | 0.00951104 |
| <a href="#">GO:0006722</a> | BP       | triterpenoid metabolic process                                                               | 1              | 0    | 0.00954903 |
| <a href="#">GO:0016104</a> | BP       | triterpenoid biosynthetic process                                                            | 1              | 0    | 0.00954903 |
| <a href="#">GO:0019742</a> | BP       | pentacyclic triterpenoid metabolic process                                                   | 1              | 0    | 0.00954903 |
| <a href="#">GO:0019745</a> | BP       | pentacyclic triterpenoid biosynthetic process                                                | 1              | 0    | 0.00954903 |
| <a href="#">GO:0021591</a> | BP       | ventricular system development                                                               | 1              | 0    | 0.009551   |
| <a href="#">GO:0021670</a> | BP       | lateral ventricle development                                                                | 1              | 0    | 0.009551   |
| <a href="#">GO:0055094</a> | BP       | response to lipoprotein stimulus                                                             | 0              | 1    | 0.0102067  |
| <a href="#">GO:0051547</a> | BP       | regulation of keratinocyte migration                                                         | 0              | 1    | 0.0103724  |
| <a href="#">GO:0051549</a> | BP       | positive regulation of keratinocyte migration                                                | 0              | 1    | 0.0103724  |
| <a href="#">GO:0044283</a> | BP       | small molecule biosynthetic process                                                          | 1              | 2    | 0.0111576  |
| <a href="#">GO:0021846</a> | BP       | cell proliferation in forebrain                                                              | 1              | 0    | 0.0111652  |
| <a href="#">GO:0006633</a> | BP       | fatty acid biosynthetic process                                                              | 1              | 1    | 0.0115736  |
| <a href="#">GO:0030574</a> | BP       | collagen catabolic process                                                                   | 0              | 1    | 0.0117449  |
| <a href="#">GO:0015820</a> | BP       | leucine transport                                                                            | 0              | 1    | 0.0117529  |
| <a href="#">GO:1900755</a> | BP       | branched-chain amino-acid anion transport                                                    | 0              | 1    | 0.0117529  |
| <a href="#">GO:0051546</a> | BP       | keratinocyte migration                                                                       | 0              | 1    | 0.0119144  |
| <a href="#">GO:0044003</a> | BP       | modification by symbiont of host morphology or physiology                                    | 0              | 1    | 0.013036   |
| <a href="#">GO:0055057</a> | BP       | neuroblast division                                                                          | 1              | 0    | 0.013864   |
| <a href="#">GO:0015803</a> | BP       | branched-chain aliphatic amino acid transport                                                | 0              | 1    | 0.0142855  |
| <a href="#">GO:0035094</a> | BP       | response to nicotine                                                                         | 0              | 1    | 0.0143034  |
| <a href="#">GO:0044243</a> | BP       | multicellular organismal catabolic process                                                   | 0              | 1    | 0.0146319  |
| <a href="#">GO:0042886</a> | BP       | amide transport                                                                              | 1              | 0    | 0.015095   |
| <a href="#">GO:0031915</a> | BP       | positive regulation of synaptic plasticity                                                   | 0              | 1    | 0.0165538  |
| <a href="#">GO:0055093</a> | BP       | response to hyperoxia                                                                        | 0              | 1    | 0.0168077  |
| <a href="#">GO:0018195</a> | BP       | peptidyl-arginine modification                                                               | 0              | 1    | 0.0169921  |
| <a href="#">GO:0006508</a> | BP       | proteolysis                                                                                  | 3              | 2    | 0.0178713  |
| <a href="#">GO:0042493</a> | BP       | response to drug                                                                             | 1              | 1    | 0.0179224  |
| <a href="#">GO:0009065</a> | BP       | glutamine family amino acid catabolic process                                                | 1              | 0    | 0.0185135  |
| <a href="#">GO:0030858</a> | BP       | positive regulation of epithelial cell differentiation                                       | 1              | 0    | 0.0194834  |
| <a href="#">GO:0060033</a> | BP       | anatomical structure regression                                                              | 0              | 1    | 0.0198409  |
| <a href="#">GO:0050775</a> | BP       | positive regulation of dendrite morphogenesis                                                | 1              | 0    | 0.0198532  |
| <a href="#">GO:0031668</a> | BP       | cellular response to extracellular stimulus                                                  | 1              | 1    | 0.0201539  |
| <a href="#">GO:0021872</a> | BP       | forebrain generation of neurons                                                              | 1              | 0    | 0.0217616  |
| <a href="#">GO:0060479</a> | BP       | lung cell differentiation                                                                    | 1              | 0    | 0.0218822  |
| <a href="#">GO:0060487</a> | BP       | lung epithelial cell differentiation                                                         | 1              | 0    | 0.0218822  |
| <a href="#">GO:0008272</a> | BP       | sulfate transport                                                                            | 1              | 0    | 0.0218896  |
| <a href="#">GO:0008610</a> | BP       | lipid biosynthetic process                                                                   | 2              | 1    | 0.022386   |
| <a href="#">GO:0007566</a> | BP       | embryo implantation                                                                          | 0              | 1    | 0.0232497  |
| <a href="#">GO:0006525</a> | BP       | arginine metabolic process                                                                   | 1              | 1    | 0.023798   |
| <a href="#">GO:0007405</a> | BP       | neuroblast proliferation                                                                     | 1              | 0    | 0.026249   |
| <a href="#">GO:0048103</a> | BP       | somatic stem cell division                                                                   | 1              | 0    | 0.0262981  |
| <a href="#">GO:0072537</a> | BP       | fibroblast activation                                                                        | 1              | 0    | 0.0271172  |
| <a href="#">GO:0071496</a> | BP       | cellular response to external stimulus                                                       | 1              | 1    | 0.027315   |
| <a href="#">GO:0051180</a> | BP       | vitamin transport                                                                            | 1              | 0    | 0.0278874  |
| <a href="#">GO:0016999</a> | BP       | antibiotic metabolic process                                                                 | 1              | 0    | 0.0281423  |
| <a href="#">GO:0034332</a> | BP       | adherens junction organization                                                               | 1              | 0    | 0.0283483  |
| <a href="#">GO:0015804</a> | BP       | neutral amino acid transport                                                                 | 0              | 1    | 0.0284833  |
| <a href="#">GO:0051817</a> | BP       | modification of morphology or physiology of other organism involved in symbiotic interaction | 0              | 1    | 0.0287122  |
| <a href="#">GO:0060428</a> | BP       | lung epithelium development                                                                  | 1              | 0    | 0.0297913  |
| <a href="#">GO:0050819</a> | BP       | negative regulation of coagulation                                                           | 0              | 1    | 0.0301457  |

| ACC        | Category | Definition                                                                                | Regulated gene |      | p-value     |
|------------|----------|-------------------------------------------------------------------------------------------|----------------|------|-------------|
|            |          |                                                                                           | Up             | Down |             |
| GO:0035690 | BP       | cellular response to drug                                                                 | 1              | 0    | 0.0304062   |
| GO:0017145 | BP       | stem cell division                                                                        | 1              | 0    | 0.031876    |
| GO:0016051 | BP       | carbohydrate biosynthetic process                                                         | 2              | 0    | 0.0325671   |
| GO:0048545 | BP       | response to steroid hormone stimulus                                                      | 0              | 2    | 0.0326385   |
| GO:0006094 | BP       | gluconeogenesis                                                                           | 1              | 0    | 0.0327722   |
| GO:0055114 | BP       | oxidation-reduction process                                                               | 4              | 0    | 0.0349281   |
| GO:0019048 | BP       | virus-host interaction                                                                    | 0              | 1    | 0.0359779   |
| GO:0017144 | BP       | drug metabolic process                                                                    | 1              | 0    | 0.0366382   |
| GO:0045746 | BP       | negative regulation of Notch signaling pathway                                            | 1              | 0    | 0.037303    |
| GO:0016126 | BP       | sterol biosynthetic process                                                               | 1              | 0    | 0.038073    |
| GO:0006629 | BP       | lipid metabolic process                                                                   | 3              | 1    | 0.038336    |
| GO:0006631 | BP       | fatty acid metabolic process                                                              | 1              | 1    | 0.0387578   |
| GO:0044419 | BP       | interspecies interaction between organisms                                                | 1              | 1    | 0.0398852   |
| GO:0071347 | BP       | cellular response to interleukin-1                                                        | 0              | 1    | 0.0403745   |
| GO:0043648 | BP       | dicarboxylic acid metabolic process                                                       | 1              | 0    | 0.0405356   |
| GO:0032963 | BP       | collagen metabolic process                                                                | 0              | 1    | 0.0411421   |
| GO:0044259 | BP       | multicellular organismal macromolecule metabolic process                                  | 0              | 1    | 0.0411421   |
| GO:0035821 | BP       | modification of morphology or physiology of other organism                                | 0              | 1    | 0.0413052   |
| GO:0043154 | BP       | negative regulation of cysteine-type endopeptidase activity involved in apoptotic process | 1              | 0    | 0.0420778   |
| GO:2000117 | BP       | negative regulation of cysteine-type endopeptidase activity                               | 1              | 0    | 0.0420778   |
| GO:0042398 | BP       | cellular modified amino acid biosynthetic process                                         | 0              | 1    | 0.0423695   |
| GO:0006730 | BP       | one-carbon metabolic process                                                              | 1              | 0    | 0.0425298   |
| GO:0019319 | BP       | hexose biosynthetic process                                                               | 1              | 0    | 0.0434838   |
| GO:0030334 | BP       | regulation of cell migration                                                              | 1              | 1    | 0.0435087   |
| GO:0044236 | BP       | multicellular organismal metabolic process                                                | 0              | 1    | 0.0439448   |
| GO:0061351 | BP       | neural precursor cell proliferation                                                       | 1              | 0    | 0.0445523   |
| GO:2000145 | BP       | regulation of cell motility                                                               | 1              | 1    | 0.0461137   |
| GO:0007586 | BP       | digestion                                                                                 | 1              | 0    | 0.0463652   |
| GO:0048814 | BP       | regulation of dendrite morphogenesis                                                      | 1              | 0    | 0.0471453   |
| GO:0070555 | BP       | response to interleukin-1                                                                 | 0              | 1    | 0.048985    |
| GO:0034612 | BP       | response to tumor necrosis factor                                                         | 0              | 1    | 0.0490052   |
| GO:0019233 | BP       | sensory perception of pain                                                                | 1              | 0    | 0.049195    |
| GO:0032355 | BP       | response to estradiol stimulus                                                            | 0              | 1    | 0.0499926   |
| GO:0016020 | CC       | membrane                                                                                  | 15             | 9    | 3.55E-05    |
| GO:0005576 | CC       | extracellular region                                                                      | 6              | 4    | 0.000157129 |
| GO:0005575 | CC       | cellular_component                                                                        | 30             | 8    | 0.000246254 |
| GO:0044425 | CC       | membrane part                                                                             | 17             | 2    | 0.000315492 |
| GO:0031224 | CC       | intrinsic to membrane                                                                     | 16             | 1    | 0.0004088   |
| GO:0016021 | CC       | integral to membrane                                                                      | 15             | 1    | 0.000985323 |
| GO:0017090 | CC       | meprin A complex                                                                          | 1              | 0    | 0.00188578  |
| GO:0005615 | CC       | extracellular space                                                                       | 1              | 3    | 0.00527238  |
| GO:0072562 | CC       | blood microparticle                                                                       | 0              | 1    | 0.00579968  |
| GO:0072563 | CC       | endothelial microparticle                                                                 | 0              | 1    | 0.00579968  |
| GO:0005886 | CC       | plasma membrane                                                                           | 8              | 3    | 0.00621419  |
| GO:0071944 | CC       | cell periphery                                                                            | 8              | 3    | 0.0100907   |
| GO:0044421 | CC       | extracellular region part                                                                 | 2              | 3    | 0.0113203   |
| GO:0005624 | CC       | membrane fraction                                                                         | 3              | 0    | 0.0209092   |
| GO:0005626 | CC       | insoluble fraction                                                                        | 3              | 0    | 0.0237271   |
| GO:0019031 | CC       | viral envelope                                                                            | 1              | 0    | 0.0286916   |
| GO:0000267 | CC       | cell fraction                                                                             | 3              | 0    | 0.035624    |
| GO:0055036 | CC       | virion membrane                                                                           | 1              | 0    | 0.0422082   |
| GO:0045177 | CC       | apical part of cell                                                                       | 2              | 0    | 0.0424893   |
| GO:0030424 | CC       | axon                                                                                      | 2              | 0    | 0.0442162   |
| GO:0005811 | CC       | lipid particle                                                                            | 0              | 2    | 0.0461664   |
| GO:0043034 | CC       | costamere                                                                                 | 0              | 1    | 0.0479751   |

**Supplementary Table S1b.** Gene ontology enrichment test in the spleen of susceptible chicken line 7.2 with  $p < 0.05$  and  $\text{Log}_2$ -transformations of the normalization  $\geq 2$  (MF: molecular function, BP: biological process and CC: cellular component). The data showed the number of genes which were up- and downregulated in susceptible chicken line 7.2.

| ACC | Category | Definition | Regulated gene |      | p-value |
|-----|----------|------------|----------------|------|---------|
|     |          |            | Up             | Down |         |

| ACC                        | Category | Definition                                                    | Regulated gene |      | p-value    |
|----------------------------|----------|---------------------------------------------------------------|----------------|------|------------|
|                            |          |                                                               | Up             | Down |            |
| <a href="#">GO:0008933</a> | MF       | lytic transglycosylase activity                               | 0              | 1    | 0.0010512  |
| <a href="#">GO:0022892</a> | MF       | substrate-specific transporter activity                       | 6              | 1    | 0.00105122 |
| <a href="#">GO:0004055</a> | MF       | argininosuccinate synthase activity                           | 0              | 1    | 0.00213383 |
| <a href="#">GO:0043825</a> | MF       | succinylornithine transaminase activity                       | 1              | 0    | 0.00273775 |
| <a href="#">GO:0004026</a> | MF       | alcohol O-acetyltransferase activity                          | 0              | 1    | 0.00283308 |
| <a href="#">GO:0034318</a> | MF       | alcohol O-acyltransferase activity                            | 0              | 1    | 0.00283308 |
| <a href="#">GO:0034319</a> | MF       | alcohol O-butanoyltransferase activity                        | 0              | 1    | 0.00283308 |
| <a href="#">GO:0034323</a> | MF       | O-butanoyltransferase activity                                | 0              | 1    | 0.00283308 |
| <a href="#">GO:0034326</a> | MF       | butanoyltransferase activity                                  | 0              | 1    | 0.00283308 |
| <a href="#">GO:0034338</a> | MF       | short-chain carboxylesterase activity                         | 0              | 1    | 0.00283308 |
| <a href="#">GO:0005215</a> | MF       | transporter activity                                          | 6              | 1    | 0.0032377  |
| <a href="#">GO:0005499</a> | MF       | vitamin D binding                                             | 1              | 0    | 0.00362091 |
| <a href="#">GO:0004611</a> | MF       | phosphoenolpyruvate carboxykinase activity                    | 1              | 0    | 0.00370373 |
| <a href="#">GO:0004613</a> | MF       | phosphoenolpyruvate carboxykinase (GTP) activity              | 1              | 0    | 0.00370373 |
| <a href="#">GO:0008743</a> | MF       | L-threonine 3-dehydrogenase activity                          | 1              | 0    | 0.00371402 |
| <a href="#">GO:0008508</a> | MF       | bile acid:sodium symporter activity                           | 1              | 0    | 0.00607798 |
| <a href="#">GO:0008139</a> | MF       | nuclear localization sequence binding                         | 0              | 1    | 0.00648464 |
| <a href="#">GO:0015204</a> | MF       | urea transmembrane transporter activity                       | 1              | 0    | 0.00665044 |
| <a href="#">GO:0042887</a> | MF       | amide transmembrane transporter activity                      | 1              | 0    | 0.00665044 |
| <a href="#">GO:0005184</a> | MF       | neuropeptide hormone activity                                 | 1              | 0    | 0.00862614 |
| <a href="#">GO:0015125</a> | MF       | bile acid transmembrane transporter activity                  | 1              | 0    | 0.0102939  |
| <a href="#">GO:0003956</a> | MF       | NAD(P)+-protein-arginine ADP-ribosyltransferase activity      | 0              | 1    | 0.0111821  |
| <a href="#">GO:0015103</a> | MF       | inorganic anion transmembrane transporter activity            | 2              | 0    | 0.011549   |
| <a href="#">GO:0005344</a> | MF       | oxygen transporter activity                                   | 1              | 0    | 0.0124526  |
| <a href="#">GO:0022891</a> | MF       | substrate-specific transmembrane transporter activity         | 5              | 0    | 0.012562   |
| <a href="#">GO:0016740</a> | MF       | transferase activity                                          | 2              | 7    | 0.01265    |
| <a href="#">GO:0003918</a> | MF       | DNA topoisomerase (ATP-hydrolyzing) activity                  | 0              | 1    | 0.0134776  |
| <a href="#">GO:0008553</a> | MF       | hydrogen-exporting ATPase activity, phosphorylative mechanism | 1              | 0    | 0.0148506  |
| <a href="#">GO:0019825</a> | MF       | oxygen binding                                                | 1              | 0    | 0.0180823  |
| <a href="#">GO:0022857</a> | MF       | transmembrane transporter activity                            | 5              | 0    | 0.019283   |
| <a href="#">GO:0008509</a> | MF       | anion transmembrane transporter activity                      | 2              | 0    | 0.0201608  |
| <a href="#">GO:0003916</a> | MF       | DNA topoisomerase activity                                    | 0              | 1    | 0.0219479  |
| <a href="#">GO:0003810</a> | MF       | protein-glutamine gamma-glutamyltransferase activity          | 0              | 1    | 0.0221803  |
| <a href="#">GO:0022804</a> | MF       | active transmembrane transporter activity                     | 3              | 0    | 0.0225543  |
| <a href="#">GO:0019842</a> | MF       | vitamin binding                                               | 2              | 0    | 0.0236602  |
| <a href="#">GO:0015116</a> | MF       | sulfate transmembrane transporter activity                    | 1              | 0    | 0.0238317  |
| <a href="#">GO:0005048</a> | MF       | signal sequence binding                                       | 0              | 1    | 0.0242385  |
| <a href="#">GO:0004364</a> | MF       | glutathione transferase activity                              | 0              | 1    | 0.0244004  |
| <a href="#">GO:0008009</a> | MF       | chemokine activity                                            | 0              | 1    | 0.0266425  |
| <a href="#">GO:0042379</a> | MF       | chemokine receptor binding                                    | 0              | 1    | 0.0278065  |
| <a href="#">GO:0016853</a> | MF       | isomerase activity                                            | 1              | 1    | 0.0293523  |
| <a href="#">GO:0016755</a> | MF       | transferase activity, transferring amino-acyl groups          | 0              | 1    | 0.0297397  |
| <a href="#">GO:0016413</a> | MF       | O-acetyltransferase activity                                  | 0              | 1    | 0.0297724  |
| <a href="#">GO:0008028</a> | MF       | monocarboxylic acid transmembrane transporter activity        | 1              | 0    | 0.030432   |
| <a href="#">GO:0015075</a> | MF       | ion transmembrane transporter activity                        | 4              | 0    | 0.0304919  |
| <a href="#">GO:0015301</a> | MF       | anion:anion antiporter activity                               | 1              | 0    | 0.0381749  |
| <a href="#">GO:0003824</a> | MF       | catalytic activity                                            | 6              | 10   | 0.0387819  |
| <a href="#">GO:0015291</a> | MF       | secondary active transmembrane transporter activity           | 2              | 0    | 0.0397036  |
| <a href="#">GO:0005343</a> | MF       | organic acid:sodium symporter activity                        | 1              | 0    | 0.0401934  |
| <a href="#">GO:0016829</a> | MF       | lyase activity                                                | 1              | 1    | 0.0415912  |
| <a href="#">GO:0004181</a> | MF       | metallocarboxypeptidase activity                              | 1              | 0    | 0.0418653  |
| <a href="#">GO:0008483</a> | MF       | transaminase activity                                         | 1              | 0    | 0.0451902  |
| <a href="#">GO:0004091</a> | MF       | carboxylesterase activity                                     | 0              | 1    | 0.0467262  |
| <a href="#">GO:0016831</a> | MF       | carboxy-lyase activity                                        | 1              | 0    | 0.0488677  |
| <a href="#">GO:0006525</a> | BP       | arginine metabolic process                                    | 1              | 1    | 0.00025555 |
| <a href="#">GO:0009308</a> | BP       | amine metabolic process                                       | 2              | 3    | 0.00056722 |
| <a href="#">GO:0016054</a> | BP       | organic acid catabolic process                                | 2              | 1    | 0.0010466  |
| <a href="#">GO:0046395</a> | BP       | carboxylic acid catabolic process                             | 2              | 1    | 0.0010466  |

| ACC                        | Category | Definition                                       | Regulated gene |      | p-value    |
|----------------------------|----------|--------------------------------------------------|----------------|------|------------|
|                            |          |                                                  | Up             | Down |            |
| <a href="#">GO:0044282</a> | BP       | small molecule catabolic process                 | 2              | 1    | 0.00169233 |
| <a href="#">GO:0044106</a> | BP       | cellular amine metabolic process                 | 2              | 2    | 0.00268388 |
| <a href="#">GO:0009063</a> | BP       | cellular amino acid catabolic process            | 2              | 0    | 0.00270262 |
| <a href="#">GO:0009064</a> | BP       | glutamine family amino acid metabolic process    | 1              | 1    | 0.00271965 |
| <a href="#">GO:0051792</a> | BP       | medium-chain fatty acid biosynthetic process     | 0              | 1    | 0.00283308 |
| <a href="#">GO:0051793</a> | BP       | medium-chain fatty acid catabolic process        | 0              | 1    | 0.00283308 |
| <a href="#">GO:0006811</a> | BP       | ion transport                                    | 5              | 1    | 0.00348546 |
| <a href="#">GO:0006567</a> | BP       | threonine catabolic process                      | 1              | 0    | 0.00371402 |
| <a href="#">GO:0019518</a> | BP       | L-threonine catabolic process to glycine         | 1              | 0    | 0.00371402 |
| <a href="#">GO:0006105</a> | BP       | succinate metabolic process                      | 1              | 0    | 0.00431246 |
| <a href="#">GO:0019545</a> | BP       | arginine catabolic process to succinate          | 1              | 0    | 0.00431246 |
| <a href="#">GO:0009310</a> | BP       | amine catabolic process                          | 2              | 0    | 0.00439359 |
| <a href="#">GO:0016360</a> | BP       | sensory organ precursor cell fate determination  | 0              | 1    | 0.00504016 |
| <a href="#">GO:0009068</a> | BP       | aspartate family amino acid catabolic process    | 1              | 0    | 0.00521027 |
| <a href="#">GO:0051791</a> | BP       | medium-chain fatty acid metabolic process        | 0              | 1    | 0.00561711 |
| <a href="#">GO:0048241</a> | BP       | epinephrine transport                            | 0              | 1    | 0.006018   |
| <a href="#">GO:0048242</a> | BP       | epinephrine secretion                            | 0              | 1    | 0.006018   |
| <a href="#">GO:0016338</a> | BP       | calcium-independent cell-cell adhesion           | 0              | 1    | 0.00626024 |
| <a href="#">GO:0071918</a> | BP       | urea transmembrane transport                     | 1              | 0    | 0.00665044 |
| <a href="#">GO:0000270</a> | BP       | peptidoglycan metabolic process                  | 0              | 1    | 0.00773822 |
| <a href="#">GO:0006566</a> | BP       | threonine metabolic process                      | 1              | 0    | 0.00831129 |
| <a href="#">GO:0006527</a> | BP       | arginine catabolic process                       | 1              | 0    | 0.00895028 |
| <a href="#">GO:0015840</a> | BP       | urea transport                                   | 1              | 0    | 0.00906918 |
| <a href="#">GO:0006607</a> | BP       | NLS-bearing substrate import into nucleus        | 0              | 1    | 0.0106659  |
| <a href="#">GO:0008052</a> | BP       | sensory organ boundary specification             | 0              | 1    | 0.0107772  |
| <a href="#">GO:0006526</a> | BP       | arginine biosynthetic process                    | 0              | 1    | 0.0124525  |
| <a href="#">GO:0019752</a> | BP       | carboxylic acid metabolic process                | 2              | 2    | 0.0124589  |
| <a href="#">GO:0043436</a> | BP       | oxoacid metabolic process                        | 2              | 2    | 0.0124589  |
| <a href="#">GO:0006082</a> | BP       | organic acid metabolic process                   | 2              | 2    | 0.0126423  |
| <a href="#">GO:0006520</a> | BP       | cellular amino acid metabolic process            | 2              | 1    | 0.013138   |
| <a href="#">GO:0042180</a> | BP       | cellular ketone metabolic process                | 2              | 2    | 0.013814   |
| <a href="#">GO:0015698</a> | BP       | inorganic anion transport                        | 2              | 0    | 0.0140833  |
| <a href="#">GO:0042886</a> | BP       | amide transport                                  | 1              | 0    | 0.0146989  |
| <a href="#">GO:0042415</a> | BP       | norepinephrine metabolic process                 | 0              | 1    | 0.0152179  |
| <a href="#">GO:0015671</a> | BP       | oxygen transport                                 | 1              | 0    | 0.0152386  |
| <a href="#">GO:0015669</a> | BP       | gas transport                                    | 1              | 0    | 0.0168414  |
| <a href="#">GO:0009065</a> | BP       | glutamine family amino acid catabolic process    | 1              | 0    | 0.0181944  |
| <a href="#">GO:0030325</a> | BP       | adrenal gland development                        | 0              | 1    | 0.0182192  |
| <a href="#">GO:0010160</a> | BP       | formation of organ boundary                      | 0              | 1    | 0.0206901  |
| <a href="#">GO:0055010</a> | BP       | ventricular cardiac muscle tissue morphogenesis  | 0              | 1    | 0.020926   |
| <a href="#">GO:0048859</a> | BP       | formation of anatomical boundary                 | 0              | 1    | 0.02221    |
| <a href="#">GO:0003229</a> | BP       | ventricular cardiac muscle tissue development    | 0              | 1    | 0.02375    |
| <a href="#">GO:0006471</a> | BP       | protein ADP-ribosylation                         | 0              | 1    | 0.0253868  |
| <a href="#">GO:0008272</a> | BP       | sulfate transport                                | 1              | 0    | 0.0267008  |
| <a href="#">GO:0006584</a> | BP       | catecholamine metabolic process                  | 0              | 1    | 0.0274192  |
| <a href="#">GO:0006094</a> | BP       | gluconeogenesis                                  | 1              | 0    | 0.0274712  |
| <a href="#">GO:0006265</a> | BP       | DNA topological change                           | 0              | 1    | 0.0284711  |
| <a href="#">GO:0009712</a> | BP       | catechol-containing compound metabolic process   | 0              | 1    | 0.0287056  |
| <a href="#">GO:0006820</a> | BP       | anion transport                                  | 2              | 0    | 0.0288136  |
| <a href="#">GO:0071705</a> | BP       | nitrogen compound transport                      | 1              | 1    | 0.0297978  |
| <a href="#">GO:0050432</a> | BP       | catecholamine secretion                          | 0              | 1    | 0.0303896  |
| <a href="#">GO:0072537</a> | BP       | fibroblast activation                            | 1              | 0    | 0.0305875  |
| <a href="#">GO:0034311</a> | BP       | diol metabolic process                           | 0              | 1    | 0.0315112  |
| <a href="#">GO:0003208</a> | BP       | cardiac ventricle morphogenesis                  | 0              | 1    | 0.0348399  |
| <a href="#">GO:0019319</a> | BP       | hexose biosynthetic process                      | 1              | 0    | 0.0363584  |
| <a href="#">GO:0009084</a> | BP       | glutamine family amino acid biosynthetic process | 0              | 1    | 0.0364427  |
| <a href="#">GO:0018149</a> | BP       | peptide cross-linking                            | 0              | 1    | 0.0376767  |
| <a href="#">GO:0055008</a> | BP       | cardiac muscle tissue morphogenesis              | 0              | 1    | 0.0381418  |
| <a href="#">GO:0051937</a> | BP       | catecholamine transport                          | 0              | 1    | 0.0383056  |

| ACC                        | Category | Definition                                         | Regulated gene |      | p-value    |
|----------------------------|----------|----------------------------------------------------|----------------|------|------------|
|                            |          |                                                    | Up             | Down |            |
| <a href="#">GO:0006810</a> | BP       | transport                                          | 7              | 3    | 0.0403819  |
| <a href="#">GO:0043648</a> | BP       | dicarboxylic acid metabolic process                | 1              | 0    | 0.0408411  |
| <a href="#">GO:0035270</a> | BP       | endocrine system development                       | 0              | 1    | 0.0424684  |
| <a href="#">GO:0018958</a> | BP       | phenol-containing compound metabolic process       | 0              | 1    | 0.0442745  |
| <a href="#">GO:0051234</a> | BP       | establishment of localization                      | 7              | 3    | 0.0451024  |
| <a href="#">GO:0006313</a> | BP       | transposition, DNA-mediated                        | 0              | 1    | 0.0489602  |
| <a href="#">GO:0060415</a> | BP       | muscle tissue morphogenesis                        | 0              | 1    | 0.0498833  |
| <a href="#">GO:0005811</a> | CC       | lipid particle                                     | 0              | 2    | 0.00111071 |
| <a href="#">GO:0031225</a> | CC       | anchored to membrane                               | 0              | 2    | 0.0064666  |
| <a href="#">GO:0070701</a> | CC       | mucus layer                                        | 0              | 1    | 0.00906814 |
| <a href="#">GO:0070702</a> | CC       | inner mucus layer                                  | 0              | 1    | 0.00906814 |
| <a href="#">GO:0070703</a> | CC       | outer mucus layer                                  | 0              | 1    | 0.00906814 |
| <a href="#">GO:0005833</a> | CC       | hemoglobin complex                                 | 1              | 0    | 0.0103916  |
| <a href="#">GO:0016471</a> | CC       | vacuolar proton-transporting V-type ATPase complex | 1              | 0    | 0.0159078  |
| <a href="#">GO:0005865</a> | CC       | striated muscle thin filament                      | 0              | 1    | 0.0190633  |
| <a href="#">GO:0016020</a> | CC       | membrane                                           | 9              | 9    | 0.0205417  |
| <a href="#">GO:0033176</a> | CC       | proton-transporting V-type ATPase complex          | 1              | 0    | 0.025971   |

**Supplementary Table S1c.** Gene ontology enrichment test of resistant line 6.3 versus susceptible line 7.2 in the spleen with  $p < 0.05$  and Log2-transformations of the normalization of resistant/susceptible  $\geq 2$  (MF: molecular function, BP: biological process and CC: cellular component). The data showed the number of genes which were up- and downregulated in resistant chicken line 6.3 compared to susceptible chicken line 7.2.

| ACC                        | Category | Definition                                                                                                  | Regulated genes |      | p-value     |
|----------------------------|----------|-------------------------------------------------------------------------------------------------------------|-----------------|------|-------------|
|                            |          |                                                                                                             | Up              | Down |             |
| <a href="#">GO:0004175</a> | MF       | endopeptidase activity                                                                                      | 2               | 2    | 7.41E-05    |
| <a href="#">GO:0047429</a> | MF       | nucleoside-triphosphate diphosphatase activity                                                              | 1               | 0    | 0.000534732 |
| <a href="#">GO:0070011</a> | MF       | peptidase activity, acting on L-amino acid peptides                                                         | 6               | 2    | 0.000766021 |
| <a href="#">GO:0004533</a> | MF       | exoribonuclease H activity                                                                                  | 1               | 1    | 0.000845852 |
| <a href="#">GO:0008233</a> | MF       | peptidase activity                                                                                          | 6               | 2    | 0.000892198 |
| <a href="#">GO:0004527</a> | MF       | exonuclease activity                                                                                        | 2               | 1    | 0.00159076  |
| <a href="#">GO:0051786</a> | MF       | all-trans-retinol 13,14-reductase activity                                                                  | 1               | 0    | 0.00182499  |
| <a href="#">GO:0008933</a> | MF       | lytic transglycosylase activity                                                                             | 0               | 1    | 0.00219589  |
| <a href="#">GO:0016829</a> | MF       | lyase activity                                                                                              | 3               | 1    | 0.0023682   |
| <a href="#">GO:0015563</a> | MF       | uptake transmembrane transporter activity                                                                   | 1               | 0    | 0.00318461  |
| <a href="#">GO:0080138</a> | MF       | borate uptake transmembrane transporter activity                                                            | 1               | 0    | 0.00318461  |
| <a href="#">GO:0052582</a> | MF       | (+)-menthofuran synthase activity                                                                           | 1               | 0    | 0.00352433  |
| <a href="#">GO:0004532</a> | MF       | exoribonuclease activity                                                                                    | 1               | 1    | 0.00356907  |
| <a href="#">GO:0016896</a> | MF       | exoribonuclease activity, producing 5'-phosphomonoesters                                                    | 1               | 1    | 0.00356907  |
| <a href="#">GO:0016796</a> | MF       | exonuclease activity, active with either ribo- or deoxyribonucleic acids and producing 5'-phosphomonoesters | 1               | 1    | 0.00388849  |
| <a href="#">GO:0004518</a> | MF       | nuclease activity                                                                                           | 2               | 3    | 0.00421236  |
| <a href="#">GO:0004222</a> | MF       | metalloendopeptidase activity                                                                               | 2               | 1    | 0.00452514  |
| <a href="#">GO:0031694</a> | MF       | alpha-2A adrenergic receptor binding                                                                        | 0               | 1    | 0.00562692  |
| <a href="#">GO:0003964</a> | MF       | RNA-directed DNA polymerase activity                                                                        | 1               | 3    | 0.00598317  |
| <a href="#">GO:0004611</a> | MF       | phosphoenolpyruvate carboxykinase activity                                                                  | 1               | 0    | 0.00614515  |
| <a href="#">GO:0004613</a> | MF       | phosphoenolpyruvate carboxykinase (GTP) activity                                                            | 1               | 0    | 0.00614515  |
| <a href="#">GO:0015105</a> | MF       | arsenite transmembrane transporter activity                                                                 | 1               | 0    | 0.00696569  |
| <a href="#">GO:0004566</a> | MF       | beta-glucuronidase activity                                                                                 | 1               | 0    | 0.0073504   |
| <a href="#">GO:0004523</a> | MF       | ribonuclease H activity                                                                                     | 1               | 2    | 0.00751456  |
| <a href="#">GO:0047547</a> | MF       | 2-methylcitrate dehydratase activity                                                                        | 0               | 1    | 0.00789084  |
| <a href="#">GO:0034061</a> | MF       | DNA polymerase activity                                                                                     | 1               | 3    | 0.00853451  |
| <a href="#">GO:0001733</a> | MF       | galactosylceramide sulfotransferase activity                                                                | 0               | 1    | 0.00873618  |
| <a href="#">GO:0050694</a> | MF       | galactose 3-O-sulfotransferase activity                                                                     | 0               | 1    | 0.00873618  |
| <a href="#">GO:0015370</a> | MF       | solute:sodium symporter activity                                                                            | 0               | 2    | 0.00904613  |



| ACC        | Category | Definition                                                                                                   | Regulated genes |      | p-value     |
|------------|----------|--------------------------------------------------------------------------------------------------------------|-----------------|------|-------------|
|            |          |                                                                                                              | Up              | Down |             |
| GO:0016836 | MF       | hydro-lyase activity                                                                                         | 2               | 0    | 0.00949916  |
| GO:0004190 | MF       | aspartic-type endopeptidase activity                                                                         | 1               | 2    | 0.00975985  |
| GO:0070001 | MF       | aspartic-type peptidase activity                                                                             | 1               | 2    | 0.00975985  |
| GO:0035529 | MF       | NADH pyrophosphatase activity                                                                                | 1               | 0    | 0.0100091   |
| GO:0046715 | MF       | borate transmembrane transporter activity                                                                    | 1               | 0    | 0.0100095   |
| GO:0016891 | MF       | endoribonuclease activity, producing 5'-phosphomonoesters                                                    | 1               | 2    | 0.0101006   |
| GO:0015168 | MF       | glycerol transmembrane transporter activity                                                                  | 1               | 0    | 0.0103365   |
| GO:0004519 | MF       | endonuclease activity                                                                                        | 3               | 1    | 0.010481    |
| GO:0015204 | MF       | urea transmembrane transporter activity                                                                      | 1               | 0    | 0.0109939   |
| GO:0042887 | MF       | amide transmembrane transporter activity                                                                     | 1               | 0    | 0.0109939   |
| GO:0004668 | MF       | protein-arginine deiminase activity                                                                          | 0               | 1    | 0.0110373   |
| GO:0008508 | MF       | bile acid:sodium symporter activity                                                                          | 1               | 0    | 0.0110595   |
| GO:0016893 | MF       | endonuclease activity, active with either ribo- or deoxyribonucleic acids and producing 5'-phosphomonoesters | 1               | 2    | 0.0113342   |
| GO:0005355 | MF       | glucose transmembrane transporter activity                                                                   | 0               | 1    | 0.0119593   |
| GO:0015145 | MF       | monosaccharide transmembrane transporter activity                                                            | 0               | 1    | 0.0119593   |
| GO:0015149 | MF       | hexose transmembrane transporter activity                                                                    | 0               | 1    | 0.0119593   |
| GO:0004521 | MF       | endoribonuclease activity                                                                                    | 1               | 2    | 0.013506    |
| GO:0003858 | MF       | 3-hydroxybutyrate dehydrogenase activity                                                                     | 1               | 0    | 0.0143252   |
| GO:0016835 | MF       | carbon-oxygen lyase activity                                                                                 | 2               | 0    | 0.0144079   |
| GO:0016491 | MF       | oxidoreductase activity                                                                                      | 6               | 0    | 0.0145508   |
| GO:0004170 | MF       | dUTP diphosphatase activity                                                                                  | 0               | 1    | 0.0151129   |
| GO:0003824 | MF       | catalytic activity                                                                                           | 16              | 10   | 0.0155904   |
| GO:0004540 | MF       | ribonuclease activity                                                                                        | 1               | 2    | 0.0177235   |
| GO:0004528 | MF       | phosphodiesterase I activity                                                                                 | 1               | 0    | 0.0179027   |
| GO:0015125 | MF       | bile acid transmembrane transporter activity                                                                 | 1               | 0    | 0.0181056   |
| GO:0015166 | MF       | polyol transmembrane transporter activity                                                                    | 1               | 0    | 0.0182634   |
| GO:0008237 | MF       | metallopeptidase activity                                                                                    | 3               | 1    | 0.0184625   |
| GO:0015294 | MF       | solute:cation symporter activity                                                                             | 0               | 2    | 0.0189906   |
| GO:0008242 | MF       | omega peptidase activity                                                                                     | 0               | 1    | 0.0199636   |
| GO:0001968 | MF       | fibronectin binding                                                                                          | 0               | 1    | 0.0201884   |
| GO:0043169 | MF       | cation binding                                                                                               | 14              | 4    | 0.0206679   |
| GO:0043167 | MF       | ion binding                                                                                                  | 14              | 4    | 0.0209605   |
| GO:0015665 | MF       | alcohol transmembrane transporter activity                                                                   | 1               | 0    | 0.0216736   |
| GO:0016779 | MF       | nucleotidyltransferase activity                                                                              | 1               | 3    | 0.0231699   |
| GO:0004497 | MF       | monooxygenase activity                                                                                       | 2               | 0    | 0.0252525   |
| GO:0016813 | MF       | hydrolase activity, acting on carbon-nitrogen                                                                | 0               | 1    | 0.0269252   |
| GO:0004551 | MF       | nucleotide diphosphatase activity                                                                            | 1               | 0    | 0.0270368   |
| GO:0031690 | MF       | adrenergic receptor binding                                                                                  | 0               | 1    | 0.0288964   |
| GO:0046872 | MF       | metal ion binding                                                                                            | 13              | 4    | 0.0361807   |
| GO:0015081 | MF       | sodium ion transmembrane transporter activity                                                                | 0               | 2    | 0.0377544   |
| GO:0016787 | MF       | hydrolase activity                                                                                           | 9               | 4    | 0.0384575   |
| GO:0051119 | MF       | sugar transmembrane transporter activity                                                                     | 0               | 1    | 0.0436929   |
| GO:0004089 | MF       | carbonate dehydratase activity                                                                               | 2               | 0    | 0.0445549   |
| GO:0015293 | MF       | symporter activity                                                                                           | 0               | 2    | 0.0478865   |
| GO:0004866 | MF       | endopeptidase inhibitor activity                                                                             | 2               | 0    | 0.0482536   |
| GO:0061135 | MF       | endopeptidase regulator activity                                                                             | 2               | 0    | 0.0490373   |
| GO:0008028 | MF       | monocarboxylic acid transmembrane transporter activity                                                       | 1               | 0    | 0.0499747   |
| GO:0044419 | BP       | interspecies interaction between organisms                                                                   | 1               | 1    | 2.12E-05    |
| GO:0030574 | BP       | collagen catabolic process                                                                                   | 0               | 2    | 0.000172781 |
| GO:0044243 | BP       | multicellular organismal catabolic process                                                                   | 0               | 2    | 0.000244847 |
| GO:0006720 | BP       | isoprenoid metabolic process                                                                                 | 3               | 0    | 0.000529324 |
| GO:0007566 | BP       | embryo implantation                                                                                          | 1               | 1    | 0.000690813 |
| GO:0016032 | BP       | viral reproduction                                                                                           | 1               | 3    | 0.000938757 |
| GO:0043627 | BP       | response to estrogen stimulus                                                                                | 0               | 2    | 0.0011929   |
| GO:0051704 | BP       | multi-organism process                                                                                       | 1               | 6    | 0.00171616  |
| GO:0032963 | BP       | collagen metabolic process                                                                                   | 1               | 1    | 0.00227394  |
| GO:0044259 | BP       | multicellular organismal macromolecule metabolic process                                                     | 1               | 1    | 0.00227394  |
| GO:0044236 | BP       | multicellular organismal metabolic process                                                                   | 0               | 2    | 0.00250464  |

| ACC        | Category | Definition                                                      | Regulated genes |      | p-value    |
|------------|----------|-----------------------------------------------------------------|-----------------|------|------------|
|            |          |                                                                 | Up              | Down |            |
| GO:0046080 | BP       | dUTP metabolic process                                          | 0               | 2    | 0.00262305 |
| GO:0007584 | BP       | response to nutrient                                            | 1               | 2    | 0.00263182 |
| GO:0009211 | BP       | pyrimidine deoxyribonucleoside triphosphate metabolic process   | 0               | 2    | 0.0028462  |
| GO:0009219 | BP       | pyrimidine deoxyribonucleotide metabolic process                | 0               | 2    | 0.00304728 |
| GO:0009200 | BP       | deoxyribonucleoside triphosphate metabolic process              | 0               | 2    | 0.00352186 |
| GO:0032355 | BP       | response to estradiol stimulus                                  | 0               | 2    | 0.00371478 |
| GO:0019629 | BP       | propionate catabolic process, 2-methylcitrate cycle             | 0               | 1    | 0.00400373 |
| GO:0009394 | BP       | 2'-deoxyribonucleotide metabolic process                        | 0               | 2    | 0.0040798  |
| GO:0006721 | BP       | terpenoid metabolic process                                     | 2               | 0    | 0.00411059 |
| GO:0015850 | BP       | organic alcohol transport                                       | 1               | 1    | 0.00445688 |
| GO:0045471 | BP       | response to ethanol                                             | 1               | 1    | 0.00455246 |
| GO:0097305 | BP       | response to alcohol                                             | 1               | 1    | 0.00455246 |
| GO:0051701 | BP       | interaction with host                                           | 1               | 1    | 0.00491978 |
| GO:0007565 | BP       | female pregnancy                                                | 0               | 2    | 0.0049753  |
| GO:0009262 | BP       | deoxyribonucleotide metabolic process                           | 0               | 2    | 0.00503283 |
| GO:0008299 | BP       | isoprenoid biosynthetic process                                 | 2               | 0    | 0.00590401 |
| GO:0006508 | BP       | proteolysis                                                     | 6               | 2    | 0.00592331 |
| GO:0031667 | BP       | response to nutrient levels                                     | 2               | 2    | 0.00599592 |
| GO:0080029 | BP       | cellular response to boron-containing substance levels          | 1               | 0    | 0.00603303 |
| GO:0001955 | BP       | blood vessel maturation                                         | 0               | 1    | 0.0063067  |
| GO:0006278 | BP       | RNA-dependent DNA replication                                   | 1               | 3    | 0.00643116 |
| GO:0009147 | BP       | pyrimidine nucleoside triphosphate metabolic process            | 0               | 2    | 0.00656845 |
| GO:0019896 | BP       | axon transport of mitochondrion                                 | 0               | 1    | 0.00687467 |
| GO:0015700 | BP       | arsenite transport                                              | 1               | 0    | 0.00696569 |
| GO:0032526 | BP       | response to retinoic acid                                       | 0               | 2    | 0.00714133 |
| GO:0035445 | BP       | borate transmembrane transport                                  | 1               | 0    | 0.00717238 |
| GO:0019087 | BP       | transformation of host cell by virus                            | 0               | 1    | 0.00723965 |
| GO:0009991 | BP       | response to extracellular stimulus                              | 2               | 2    | 0.00729875 |
| GO:0019541 | BP       | propionate metabolic process                                    | 0               | 1    | 0.00789084 |
| GO:0019543 | BP       | propionate catabolic process                                    | 0               | 1    | 0.00789084 |
| GO:0033189 | BP       | response to vitamin A                                           | 0               | 2    | 0.00804444 |
| GO:0009719 | BP       | response to endogenous stimulus                                 | 1               | 4    | 0.00995205 |
| GO:0010036 | BP       | response to boron-containing substance                          | 1               | 0    | 0.0100095  |
| GO:0046713 | BP       | borate transport                                                | 1               | 0    | 0.0100095  |
| GO:0071705 | BP       | nitrogen compound transport                                     | 2               | 1    | 0.0101633  |
| GO:0048241 | BP       | epinephrine transport                                           | 0               | 1    | 0.0102815  |
| GO:0048242 | BP       | epinephrine secretion                                           | 0               | 1    | 0.0102815  |
| GO:0044403 | BP       | symbiosis, encompassing mutualism through parasitism            | 1               | 1    | 0.0105244  |
| GO:0015816 | BP       | glycine transport                                               | 0               | 1    | 0.0108562  |
| GO:0051385 | BP       | response to mineralocorticoid stimulus                          | 1               | 0    | 0.0109053  |
| GO:0051412 | BP       | response to corticosterone stimulus                             | 1               | 0    | 0.0109053  |
| GO:0015793 | BP       | glycerol transport                                              | 1               | 0    | 0.0109934  |
| GO:0071918 | BP       | urea transmembrane transport                                    | 1               | 0    | 0.0109939  |
| GO:0000052 | BP       | citrulline metabolic process                                    | 0               | 1    | 0.0110373  |
| GO:0018101 | BP       | peptidyl-citrulline biosynthetic process from peptidyl-arginine | 0               | 1    | 0.0110373  |
| GO:0019240 | BP       | citrulline biosynthetic process                                 | 0               | 1    | 0.0110373  |
| GO:0071460 | BP       | cellular response to cell-matrix adhesion                       | 0               | 1    | 0.0111982  |
| GO:0071404 | BP       | cellular response to low-density lipoprotein particle stimulus  | 0               | 1    | 0.0112234  |
| GO:0015074 | BP       | DNA integration                                                 | 1               | 2    | 0.0119014  |
| GO:0006220 | BP       | pyrimidine nucleotide metabolic process                         | 0               | 2    | 0.0121271  |
| GO:0042572 | BP       | retinol metabolic process                                       | 1               | 0    | 0.0125948  |
| GO:0032328 | BP       | alanine transport                                               | 0               | 1    | 0.0126352  |
| GO:0048545 | BP       | response to steroid hormone stimulus                            | 1               | 2    | 0.0138253  |
| GO:0033273 | BP       | response to vitamin                                             | 0               | 2    | 0.0142373  |
| GO:0000270 | BP       | peptidoglycan metabolic process                                 | 0               | 1    | 0.0144731  |
| GO:0071402 | BP       | cellular response to lipoprotein particle stimulus              | 0               | 1    | 0.0151801  |
| GO:0055098 | BP       | response to low-density lipoprotein particle stimulus           | 0               | 1    | 0.0151914  |
| GO:0072527 | BP       | pyrimidine-containing compound metabolic process                | 0               | 2    | 0.0157354  |
| GO:0015840 | BP       | urea transport                                                  | 1               | 0    | 0.0165188  |

| ACC        | Category | Definition                                                          | Regulated genes |      | p-value   |
|------------|----------|---------------------------------------------------------------------|-----------------|------|-----------|
|            |          |                                                                     | Up              | Down |           |
| GO:0015824 | BP       | proline transport                                                   | 0               | 1    | 0.0180736 |
| GO:0019047 | BP       | provirus integration                                                | 1               | 0    | 0.0181211 |
| GO:0019061 | BP       | uncoating of virus                                                  | 1               | 0    | 0.0181211 |
| GO:0030069 | BP       | lysogeny                                                            | 1               | 0    | 0.0181211 |
| GO:0060346 | BP       | bone trabecula formation                                            | 0               | 1    | 0.0187984 |
| GO:0061430 | BP       | bone trabecula morphogenesis                                        | 0               | 1    | 0.0187984 |
| GO:0009725 | BP       | response to hormone stimulus                                        | 2               | 2    | 0.0189292 |
| GO:0090305 | BP       | nucleic acid phosphodiester bond hydrolysis                         | 1               | 3    | 0.0189859 |
| GO:0055094 | BP       | response to lipoprotein stimulus                                    | 0               | 1    | 0.0191323 |
| GO:0071702 | BP       | organic substance transport                                         | 1               | 3    | 0.01926   |
| GO:0051547 | BP       | regulation of keratinocyte migration                                | 0               | 1    | 0.0193231 |
| GO:0051549 | BP       | positive regulation of keratinocyte migration                       | 0               | 1    | 0.0193231 |
| GO:0051546 | BP       | keratinocyte migration                                              | 0               | 1    | 0.0217672 |
| GO:0022415 | BP       | viral reproductive process                                          | 1               | 1    | 0.0220443 |
| GO:0055114 | BP       | oxidation-reduction process                                         | 6               | 0    | 0.0224917 |
| GO:0008643 | BP       | carbohydrate transport                                              | 1               | 1    | 0.0228045 |
| GO:0015820 | BP       | leucine transport                                                   | 0               | 1    | 0.0231931 |
| GO:1900755 | BP       | branched-chain amino-acid anion transport                           | 0               | 1    | 0.0231931 |
| GO:0001957 | BP       | intramembranous ossification                                        | 0               | 1    | 0.0234858 |
| GO:0036072 | BP       | direct ossification                                                 | 0               | 1    | 0.0234858 |
| GO:0032868 | BP       | response to insulin stimulus                                        | 1               | 1    | 0.0246032 |
| GO:0042415 | BP       | norepinephrine metabolic process                                    | 0               | 1    | 0.0251005 |
| GO:0006776 | BP       | vitamin A metabolic process                                         | 1               | 0    | 0.0255507 |
| GO:0044003 | BP       | modification by symbiont of host morphology or physiology           | 0               | 1    | 0.0259203 |
| GO:0007412 | BP       | axon target recognition                                             | 0               | 1    | 0.0259526 |
| GO:0060612 | BP       | adipose tissue development                                          | 1               | 0    | 0.0264902 |
| GO:0001666 | BP       | response to hypoxia                                                 | 0               | 2    | 0.0267097 |
| GO:0015803 | BP       | branched-chain aliphatic amino acid transport                       | 0               | 1    | 0.0271136 |
| GO:0019059 | BP       | initiation of viral infection                                       | 1               | 0    | 0.0271628 |
| GO:0030260 | BP       | entry into host cell                                                | 1               | 0    | 0.0271628 |
| GO:0044409 | BP       | entry into host                                                     | 1               | 0    | 0.0271628 |
| GO:0051806 | BP       | entry into cell of other organism involved in symbiotic interaction | 1               | 0    | 0.0271628 |
| GO:0051828 | BP       | entry into other organism involved in symbiotic interaction         | 1               | 0    | 0.0271628 |
| GO:0042886 | BP       | amide transport                                                     | 1               | 0    | 0.0273651 |
| GO:0055093 | BP       | response to hyperoxia                                               | 0               | 1    | 0.0277426 |
| GO:0046685 | BP       | response to arsenic-containing substance                            | 1               | 0    | 0.027967  |
| GO:0035094 | BP       | response to nicotine                                                | 0               | 1    | 0.0285816 |
| GO:0015791 | BP       | polyol transport                                                    | 1               | 0    | 0.0298649 |
| GO:0031915 | BP       | positive regulation of synaptic plasticity                          | 0               | 1    | 0.0301821 |
| GO:0001523 | BP       | retinoid metabolic process                                          | 1               | 0    | 0.0305911 |
| GO:0070482 | BP       | response to oxygen levels                                           | 0               | 2    | 0.0321618 |
| GO:0019069 | BP       | viral capsid assembly                                               | 1               | 0    | 0.0325204 |
| GO:0046797 | BP       | viral procapsid maturation                                          | 1               | 0    | 0.0325204 |
| GO:0060325 | BP       | face morphogenesis                                                  | 0               | 1    | 0.0325838 |
| GO:0060416 | BP       | response to growth hormone stimulus                                 | 1               | 0    | 0.0327757 |
| GO:0016101 | BP       | diterpenoid metabolic process                                       | 1               | 0    | 0.0328931 |
| GO:0030325 | BP       | adrenal gland development                                           | 0               | 1    | 0.0328938 |
| GO:0018195 | BP       | peptidyl-arginine modification                                      | 0               | 1    | 0.0333781 |
| GO:0060343 | BP       | trabecula formation                                                 | 0               | 1    | 0.0334187 |
| GO:0060033 | BP       | anatomical structure regression                                     | 0               | 1    | 0.0346531 |
| GO:0060323 | BP       | head morphogenesis                                                  | 0               | 1    | 0.0351934 |
| GO:0046627 | BP       | negative regulation of insulin receptor signaling pathway           | 0               | 1    | 0.0353221 |
| GO:1900077 | BP       | negative regulation of cellular response to insulin stimulus        | 0               | 1    | 0.0353221 |
| GO:0055010 | BP       | ventricular cardiac muscle tissue morphogenesis                     | 0               | 1    | 0.0364566 |
| GO:0043434 | BP       | response to peptide hormone stimulus                                | 1               | 1    | 0.0372623 |
| GO:0046626 | BP       | regulation of insulin receptor signaling pathway                    | 0               | 1    | 0.0388746 |
| GO:1900076 | BP       | regulation of cellular response to insulin stimulus                 | 0               | 1    | 0.0388746 |
| GO:0003229 | BP       | ventricular cardiac muscle tissue development                       | 0               | 1    | 0.0403232 |
| GO:0060324 | BP       | face development                                                    | 0               | 1    | 0.0410943 |

| ACC                        | Category | Definition                                     | Regulated genes |      | p-value     |
|----------------------------|----------|------------------------------------------------|-----------------|------|-------------|
|                            |          |                                                | Up              | Down |             |
| <a href="#">GO:0052126</a> | BP       | movement in host environment                   | 1               | 0    | 0.0413725   |
| <a href="#">GO:0052192</a> | BP       | movement in environment of other organism      | 1               | 0    | 0.0413725   |
| <a href="#">GO:0021700</a> | BP       | developmental maturation                       | 1               | 1    | 0.042601    |
| <a href="#">GO:0007628</a> | BP       | adult walking behavior                         | 0               | 1    | 0.0432687   |
| <a href="#">GO:0006584</a> | BP       | catecholamine metabolic process                | 0               | 1    | 0.0455282   |
| <a href="#">GO:0006260</a> | BP       | DNA replication                                | 1               | 3    | 0.0473241   |
| <a href="#">GO:0061383</a> | BP       | trabecula morphogenesis                        | 0               | 1    | 0.047444    |
| <a href="#">GO:0042493</a> | BP       | response to drug                               | 1               | 1    | 0.0481178   |
| <a href="#">GO:0042755</a> | BP       | eating behavior                                | 0               | 1    | 0.0481504   |
| <a href="#">GO:0015804</a> | BP       | neutral amino acid transport                   | 0               | 1    | 0.0483029   |
| <a href="#">GO:0009712</a> | BP       | catechol-containing compound metabolic process | 0               | 1    | 0.0484574   |
| <a href="#">GO:0050432</a> | BP       | catecholamine secretion                        | 0               | 1    | 0.049897    |
| <a href="#">GO:0044423</a> | CC       | virion part                                    | 2               | 3    | 2.65E-05    |
| <a href="#">GO:0020002</a> | CC       | host cell plasma membrane                      | 1               | 3    | 5.48E-05    |
| <a href="#">GO:0055036</a> | CC       | virion membrane                                | 1               | 0    | 5.77E-05    |
| <a href="#">GO:0033644</a> | CC       | host cell membrane                             | 1               | 3    | 7.41E-05    |
| <a href="#">GO:0044218</a> | CC       | other organism cell membrane                   | 1               | 3    | 7.92E-05    |
| <a href="#">GO:0044279</a> | CC       | other organism membrane                        | 1               | 3    | 7.92E-05    |
| <a href="#">GO:0019012</a> | CC       | virion                                         | 1               | 4    | 8.63E-05    |
| <a href="#">GO:0018995</a> | CC       | host                                           | 1               | 3    | 0.000268057 |
| <a href="#">GO:0033643</a> | CC       | host cell part                                 | 1               | 3    | 0.000268057 |
| <a href="#">GO:0043657</a> | CC       | host cell                                      | 1               | 3    | 0.000268057 |
| <a href="#">GO:0043245</a> | CC       | extraorganismal space                          | 1               | 3    | 0.000280882 |
| <a href="#">GO:0044215</a> | CC       | other organism                                 | 1               | 3    | 0.000280882 |
| <a href="#">GO:0044216</a> | CC       | other organism cell                            | 1               | 3    | 0.000280882 |
| <a href="#">GO:0044217</a> | CC       | other organism part                            | 1               | 3    | 0.000280882 |
| <a href="#">GO:0005576</a> | CC       | extracellular region                           | 8               | 4    | 0.00111473  |
| <a href="#">GO:0031225</a> | CC       | anchored to membrane                           | 1               | 2    | 0.00119462  |
| <a href="#">GO:0044421</a> | CC       | extracellular region part                      | 5               | 3    | 0.00261723  |
| <a href="#">GO:0005811</a> | CC       | lipid particle                                 | 0               | 2    | 0.00316573  |
| <a href="#">GO:0071575</a> | CC       | integral to external side of plasma membrane   | 0               | 1    | 0.00385823  |
| <a href="#">GO:0016020</a> | CC       | membrane                                       | 21              | 9    | 0.00416239  |
| <a href="#">GO:0016590</a> | CC       | ACF complex                                    | 0               | 1    | 0.0104395   |
| <a href="#">GO:0031224</a> | CC       | intrinsic to membrane                          | 21              | 0    | 0.0112493   |
| <a href="#">GO:0032588</a> | CC       | trans-Golgi network membrane                   | 0               | 1    | 0.0118958   |
| <a href="#">GO:0005678</a> | CC       | chromatin assembly complex                     | 0               | 1    | 0.0143956   |
| <a href="#">GO:0031233</a> | CC       | intrinsic to external side of plasma membrane  | 0               | 1    | 0.0206332   |
| <a href="#">GO:0005578</a> | CC       | proteinaceous extracellular matrix             | 0               | 4    | 0.02211     |
| <a href="#">GO:0019028</a> | CC       | viral capsid                                   | 1               | 1    | 0.0306338   |
| <a href="#">GO:0071944</a> | CC       | cell periphery                                 | 12              | 3    | 0.0307419   |
| <a href="#">GO:0044425</a> | CC       | membrane part                                  | 20              | 2    | 0.0316867   |
| <a href="#">GO:0031012</a> | CC       | extracellular matrix                           | 0               | 4    | 0.0324155   |
| <a href="#">GO:0016021</a> | CC       | integral to membrane                           | 18              | 1    | 0.0337337   |
| <a href="#">GO:0005886</a> | CC       | plasma membrane                                | 11              | 3    | 0.0374987   |
| <a href="#">GO:0005887</a> | CC       | integral to plasma membrane                    | 0               | 4    | 0.0433339   |
| <a href="#">GO:0019031</a> | CC       | viral envelope                                 | 1               | 0    | 0.047653    |

**Supplementary Table S2.** Details of the 107 novel up- and downregulated genes in the spleen of the two chicken lines. The data showed significant changes in the gene expression of the 107 novel genes in the NE-afflicted chicken lines. The genes included here showed significant differences in gene expression ( $p < 0.001$ , Log<sub>2</sub>-transformations of the normalization).

| Align | ID          | Line 6.3  | Line 7.2  | P-Value  | Align | ID          | Line 6.3   | Line 7.2  | P-Value  |
|-------|-------------|-----------|-----------|----------|-------|-------------|------------|-----------|----------|
| 1     | MERGE000551 | 2136.97   | 0.299379  | 0.00001  | 55    | MERGE026303 | 722.45     | 0.911791  | 0.000069 |
| 2     | MERGE000617 | 5.35256   | 0.0971332 | 0.00003  | 56    | MERGE026452 | 0.691953   | 23.303    | 0.000232 |
| 3     | MERGE000618 | 3.50802   | 0.188697  | 0.000026 | 57    | MERGE026502 | 17.3414    | 2.29048   | 0.000194 |
| 4     | MERGE000944 | 0.131426  | 3.34162   | 0.000013 | 58    | MERGE026554 | 0.498798   | 17.4815   | 0.00029  |
| 5     | MERGE001890 | 33.1856   | 2.09431   | 0.000024 | 59    | MERGE026559 | 56.695     | 1.21542   | 0.000011 |
| 6     | MERGE001892 | 1.94946   | 0.0565148 | 0.000002 | 60    | MERGE026611 | 0.00466288 | 0.358285  | 0.000037 |
| 7     | MERGE001986 | 1.62426   | 0.0174069 | 0.000223 | 61    | MERGE026690 | 0          | 150808    | 0.000169 |
| 8     | MERGE003380 | 2.36542   | 1.09E-08  | 0.00002  | 62    | MERGE026742 | 17.7466    | 0.111535  | 0.000002 |
| 9     | MERGE004114 | 2542.29   | 418.361   | 0.00012  | 63    | MERGE026743 | 12.0938    | 0.296218  | 0.000017 |
| 10    | MERGE004703 | 27.5891   | 8.14928   | 0.000052 | 64    | MERGE026977 | 0.0841445  | 6.22033   | 0.000089 |
| 11    | MERGE006359 | 0.347298  | 4.20567   | 0.000181 | 65    | MERGE027165 | 7.39997    | 0.373603  | 0.000195 |
| 12    | MERGE006582 | 0.0887352 | 2.36354   | 0.000212 | 66    | MERGE027183 | 516.88     | 0.427449  | 0.000209 |
| 13    | MERGE006584 | 0.0960111 | 3.63323   | 0.00003  | 67    | MERGE027402 | 0.166846   | 9.39216   | 0.000047 |
| 14    | MERGE006615 | 203.441   | 4.1005    | 0.00048  | 68    | MERGE027408 | 0.116773   | 9.01353   | 0.000007 |
| 15    | MERGE007249 | 1807.33   | 131.641   | 0.00028  | 69    | MERGE027425 | 31.3806    | 3.20114   | 0.000269 |
| 16    | MERGE007250 | 3656.99   | 370.669   | 0.00024  | 70    | MERGE027438 | 52.4236    | 1.53551   | 0.000097 |
| 17    | MERGE008766 | 0.115329  | 645.198   | 0.000005 | 71    | MERGE027503 | 0.506263   | 14.3587   | 0.000001 |
| 18    | MERGE009685 | 135.27    | 11.3463   | 0.000248 | 72    | MERGE027638 | 28.9093    | 4.60078   | 0.000003 |
| 19    | MERGE009859 | 0.0158767 | 1.66938   | 0.00013  | 73    | MERGE027776 | 3.48675    | 29.1998   | 0.000005 |
| 20    | MERGE009862 | 0.0147668 | 1.11988   | 0.000079 | 74    | MERGE027843 | 0.265967   | 3.62531   | 0.000127 |
| 21    | MERGE011093 | 0.260391  | 9.21101   | 0.000079 | 75    | MERGE027851 | 9.92577    | 1.11266   | 0.000149 |
| 22    | MERGE011720 | 0.0939934 | 2.42406   | 0.000163 | 76    | MERGE027864 | 5.03866    | 0.0589511 | 0.000035 |
| 23    | MERGE011796 | 1.17005   | 9.83704   | 0.000165 | 77    | MERGE027951 | 0.424828   | 14.1378   | 0.000013 |
| 24    | MERGE011843 | 189.587   | 38.0563   | 0.00063  | 78    | MERGE028014 | 0.140447   | 4.5427    | 0.000004 |
| 25    | MERGE012002 | 5.91058   | 0.0707595 | 0.000001 | 79    | MERGE028162 | 45.366     | 3.25828   | 0.000108 |
| 26    | MERGE012743 | 101.042   | 21.7745   | 0.000063 | 80    | MERGE028374 | 1.14716    | 21.675    | 0.000001 |
| 27    | MERGE012902 | 1.52806   | 0.0779027 | 0.000103 | 81    | MERGE028465 | 31.9067    | 0.121619  | 0.000022 |
| 28    | MERGE013363 | 42.4419   | 11.5543   | 0.000001 | 82    | MERGE028470 | 34.982     | 3.54287   | 0.000052 |
| 29    | MERGE014107 | 14.2182   | 0.0221362 | 0.000022 | 83    | MERGE028475 | 30.2852    | 0.441379  | 0.000004 |
| 30    | MERGE014878 | 94.7909   | 26.3151   | 0.000002 | 84    | MERGE028484 | 0.0788914  | 2.33215   | 0.000108 |
| 31    | MERGE016657 | 0.210053  | 0.010179  | 0.000263 | 85    | MERGE028525 | 0.314738   | 5.959     | 0.000095 |
| 32    | MERGE016754 | 1.9062    | 0.201944  | 0.000114 | 86    | MERGE028547 | 0.0387693  | 3.16784   | 0.000089 |
| 33    | MERGE017199 | 3.5207    | 0.160044  | 0.000011 | 87    | MERGE028556 | 0.168418   | 12.3046   | 0.00008  |
| 34    | MERGE017201 | 3.94706   | 0.199663  | 0.00018  | 88    | MERGE028770 | 11.7212    | 0.434151  | 0.000083 |
| 35    | MERGE017202 | 2.71074   | 0.0834113 | 0.00001  | 89    | MERGE028908 | 824.188    | 2388.62   | 0.000042 |
| 36    | MERGE017811 | 51.1047   | 0.968184  | 0.000002 | 90    | MERGE028967 | 8.73409    | 0.203217  | 0.000003 |
| 37    | MERGE017813 | 127.141   | 6.51689   | 0.000004 | 91    | MERGE028983 | 0.00234716 | 3.17869   | 0.000269 |
| 38    | MERGE018593 | 7.47913   | 0.624983  | 0.000105 | 92    | MERGE029032 | 0.49295    | 15.8866   | 0.000007 |
| 39    | MERGE019909 | 22.6466   | 3.91193   | 0.000001 | 93    | MERGE029081 | 0.012317   | 4.0843    | 0.0001   |
| 40    | MERGE023028 | 17.0676   | 0.651791  | 0.000001 | 94    | MERGE029100 | 13.0374    | 0.319954  | 0.00018  |
| 41    | MERGE023671 | 41.0883   | 6.09047   | 0.000039 | 95    | MERGE029165 | 15.0278    | 436.474   | 0.00008  |
| 42    | MERGE025414 | 2.48584   | 0.0616675 | 0.000194 | 96    | MERGE029168 | 209.505    | 1467.47   | 0.00010  |
| 43    | MERGE025515 | 4.8911    | 0.211326  | 0.000001 | 97    | MERGE029220 | 3.30095    | 0.0202832 | 0.000002 |
| 44    | MERGE025584 | 8.08979   | 0.0975418 | 0.000009 | 98    | MERGE029362 | 7.7485     | 0.033152  | 0.000121 |
| 45    | MERGE025588 | 6.15473   | 0.169144  | 0.000098 | 99    | MERGE029392 | 0.208215   | 34.6643   | 0.000002 |
| 46    | MERGE025594 | 6.4614    | 0.0935933 | 0.00004  | 100   | MERGE029474 | 6.33528    | 0.0620386 | 0.000001 |
| 47    | MERGE025619 | 5.55924   | 0.0589723 | 0.000007 | 101   | MERGE029569 | 7.9446     | 0.216283  | 0.000048 |
| 48    | MERGE025745 | 1.19203   | 12.2097   | 0.000055 | 102   | MERGE029570 | 6.57315    | 0.252599  | 0.000038 |

| <b>Align</b> | <b>ID</b>    | <b>Line 6.3</b> | <b>Line 7.2</b> | <b>P-Value</b> | <b>Align</b> | <b>ID</b>    | <b>Line 6.3</b> | <b>Line 7.2</b> | <b>P-Value</b> |
|--------------|--------------|-----------------|-----------------|----------------|--------------|--------------|-----------------|-----------------|----------------|
| 49           | MERGEG025809 | 44.6485         | 0.794799        | 0.00001        | 103          | MERGEG029610 | 7.61695         | 69.81           | 0.000166       |
| 50           | MERGEG025958 | 3.13714         | 4.03167         | 0.000011       | 104          | MERGEG029676 | 37.4481         | 1.32459         | 0.000046       |
| 51           | MERGEG025992 | 320.944         | 0.0198383       | 0.000031       | 105          | MERGEG029773 | 7.31126         | 0.131129        | 0.000256       |
| 52           | MERGEG026053 | 9.61143         | 0.479531        | 0.000164       | 106          | MERGEG029791 | 25.0124         | 3.28569         | 0.000117       |
| 53           | MERGEG026071 | 105.14          | 29.9747         | 0.000108       | 107          | MERGEG030130 | 31.3201         | 493.883         | 0.00026        |
| 54           | MERGEG026263 | 102.943         | 15.0452         | 0.000001       |              |              |                 |                 |                |

**Supplementary Table S3.** Differentially expressed genes related to antigen processing between the spleen of each of the samples and the two chicken lines. This data showed significant changes in the gene expression of the 139 immune-related genes in the two NE-afflicted chicken lines. The genes included here showed significant differences in gene expression with  $p < 0.01$ , Log<sub>2</sub>-transformations of the normalization.

| Gene name                                                | Accession no   | Fold changes |          |
|----------------------------------------------------------|----------------|--------------|----------|
|                                                          |                | Line 6.3     | Line 7.2 |
| Beta-defensin 1 (AvBD1) gene                             | NM_204993      | 6.27         | 3.09     |
| Beta-defensin 3 ST1 (AvBD3ST1) gene                      | XM_004934447   | -1.73        | -0.82    |
| Beta-defensin 3 ST2 (AvBD3ST2) gene                      | NM_001277431   | -1.19        | -1.38    |
| Beta-defensin 9 (AvBD9) gene                             | AY621321       | 7.01         | 7.04     |
| Beta-defensin 7 (AvBD7) gene                             | AY621322       | 5.68         | 0.00     |
| Beta-defensin 10 (AvBD10) gene                           | AY621323       | 0            | 0        |
| Bundling protein                                         | NM_204127      | 8.38         | 8.18     |
| Rho GDP dissociation inhibitor (GDI) beta                | NM_001277364   | 7.73         | 7.71     |
| Actin related protein 2/3 complex, subunit 1B            | NM_001030632   | 8.82         | 8.75     |
| Brain abundant, membrane attached signal protein 1       | NM_204116      | 7.99         | 8.29     |
| Beaded filament structural protein 1                     | NM_205151      | 3.87         | 2.77     |
| Chromosome 6 open reading frame                          | XM_001231980   | 6.68         | 6.48     |
| Complement component 1, q subcomponent, A chain          | XM_417654      | 7.66         | 8.00     |
| Complement component 1, q subcomponent, C chain          | XM_417653      | 6.57         | 6.86     |
| Coiled-coil domain containing 57                         | XM_415635      | -3.32        | 9.33     |
| CD3e molecule, epsilon                                   | NM_206904      | 8.48         | 8.80     |
| Immunoglobulin-associated beta                           | NM_001006328   | 7.06         | 7.14     |
| Carbohydrate (N-acetylglucosamine-6-O)sulfotransferase 2 | XM_003641759   | 6.27         | 6.96     |
| Cold inducible RNA binding protein                       | NM_001031347   | 8.97         | 9.30     |
| CKLF-like MARVEL transmembrane domain containing 3       | NM_001001778   | 7.52         | 7.99     |
| Complement component (3d/Epstein Barr virus) receptor 2  | XM_002196472   | 6.87         | 6.10     |
| Cellular repressor of E1A-stimulated genes 1             | XM_003640464   | 8.70         | 8.19     |
| Colony stimulating factor 3 receptor                     | NM_001030898   | 7.43         | 6.99     |
| C-src tyrosine kinase                                    | NM_205425      | 10.16        | 9.96     |
| Cytochrome b-245, beta polypeptide                       | NM_001100286   | 6.73         | 7.17     |
| Cytohesin 1                                              | NM_001031105   | 7.61         | 7.95     |
| Dual adaptor of phosphotyrosine and 3-phosphoinositides  | NM_001012933   | 6.04         | 6.08     |
| Deleted in malignant brain tumors 1                      | XM_003643135.1 | 6.23         | 6.22     |
| Ets variant gene 6                                       | NM_001199273   | 7.46         | 0.00     |
| Extracellular fatty acid binding protein                 | AY545055       | 8.36         | 8.14     |
| Formin-like 1                                            | XM_001234504   | 8.03         | 8.05     |
| Guanine nucleotide binding protein                       | NM_205402      | 8.18         | 8.09     |
| GRB2-related adaptor protein                             | NM_001277553   | 7.20         | 7.61     |
| Alpha-D-globin                                           | NM_001004375   | 10.82        | 7.04     |
| Hepatic and glial cell adhesion molecule                 | XM_425793      | 7.92         | 6.70     |
| HtrA serine peptidase 1                                  | XM_003641501   | 6.00         | 5.92     |
| Hydrogen voltage-gated channel 1                         | NM_001030663   | 7.08         | 7.40     |
| Interferon, gamma-inducible protein 30                   | XM_418246      | 8.61         | 8.86     |
| Immunoglobulin J polypeptide                             | NM_204263      | 8.81         | 10.21    |
| Immunoglobulin superfamily, member 1                     | XM_003643874   | 6.02         | 3.85     |
| Inverted formin, FH2 and WH2 domain                      | XM_421396      | 4.86         | 3.46     |
| Interferon regulatory factor 5                           | NM_001031587   | 6.69         | 6.98     |
| Janus kinase 3                                           | NM_204996      | 7.68         | 7.97     |
| Lysosomal protein transmembrane 5                        | XM_417701      | 8.86         | 9.12     |
| Macrophage receptor with collagenous structure           | NM_204736      | 8.43         | 8.27     |
| Muscleblind-like                                         | NM_001163327   | 8.02         | 7.94     |
| Microtubule associated monooxygenase, calponin and LIM   | NM_001031576   | 8.06         | 8.63     |

| Gene name                                                                | Accession no   | Fold changes |          |
|--------------------------------------------------------------------------|----------------|--------------|----------|
|                                                                          |                | Line 6.3     | Line 7.2 |
| Myosin IF                                                                | NM_205254      | 7.01         | 7.30     |
| NUAK family, SNF1-like kinase                                            | XM_416310      | 5.76         | 5.43     |
| OTU domain containing 1                                                  | XM_418604      | 7.58         | 6.41     |
| Purinergic receptor P2Y                                                  | NM_001008679   | 7.21         | 7.17     |
| Phosphatidylinositol transfer protein, beta                              | NM_001039266   | 6.63         | 6.65     |
| Pleckstrin                                                               | NM_204863      | 7.78         | 7.33     |
| Protein phosphatase 1, regulatory (inhibitor) subunit 9B                 | XM_003644026.1 | 7.72         | 7.97     |
| Protein tyrosine phosphatase, receptor type, C                           | NM_204417      | 8.57         | 8.71     |
| Quaking homolog, KH domain RNA binding                                   | NM_204310      | 7.07         | 6.79     |
| Ras association (RalGDS/AF-6) domain family member 2                     | NM_001030884   | 7.29         | 7.33     |
| Ribosomal protein L29                                                    | NM_001171677   | 10.74        | 11.22    |
| Leukocyte ribonuclease A-2                                               | NM_001007942   | 8.33         | 8.47     |
| Selectin E                                                               | XM_422207.3    | 7.22         | 6.86     |
| Small ArfGAP2                                                            | NM_001030902   | 7.93         | 7.96     |
| SPEG complex locus                                                       | XM_004176748   | 0            | 7.20     |
| Spi-C transcription factor                                               | XM_425488      | 6.69         | 6.46     |
| Serine/threonine kinase 38                                               | XM_003642721   | 6.62         | 6.57     |
| Synaptonemal complex central element protein 3                           | XM_001231763   | 0            | 7.61     |
| Transcription factor 7 (T-cell specific, HMG-box)                        | NM_204547      | 6.68         | 7.08     |
| Transforming growth factor, beta-induced                                 | NM_205036      | 6.84         | 6.63     |
| Tetratricopeptide repeat domain 27                                       | NM_001012567   | 4.79         | 4.97     |
| Unc-119 homolog B                                                        | XM_415263      | 6.36         | 6.23     |
| WDFY family member 4                                                     | XM_003641478   | 6.25         | 6.39     |
| Zinc finger E-box binding homeobox 2                                     | XM_422151      | 6.30         | 5.93     |
| Allograft inflammatory factor 1-like                                     | XM_415461      | 8.34         | 8.20     |
| Argininosuccinate synthase 1 (ASS1)                                      | NM_001013395   | 7.97         | 8.24     |
| ATPase, Na <sup>+</sup> /K <sup>+</sup> transporting, beta 3 polypeptide | NM_205535      | 5.85         | 5.81     |
| Avidin-related protein 4/5-like                                          | XM_001233209   | 4.97         | 8.95     |
| Uncharacterized LOC419592                                                | XM_417739      | 8.59         | 8.44     |
| Carbonic anhydrase 13-like                                               | XM_003640811   | 6.94         | 5.15     |
| Chemokine (C-C Motif) Ligand                                             | XM_415780      | 6.39         | 7.30     |
| C-type lectin domain family 17                                           | XM_423779      | 6.01         | 6.41     |
| Complement receptor type 2-like                                          | XM_001235095   | 5.79         | 5.85     |
| Friend leukemia virus integration 1 (FLI1)                               | M_001030908    | 6.94         | 6.72     |
| DEAD (Asp-Glu-Ala-Asp) box polypeptide 17                                | XM_416260      | 8.56         | 8.65     |
| Major histocompatibility complex class II beta chain                     | S66480         | 10.15        | 10.49    |
| Viral interleukin-8 homolog                                              | XM_420473      | 8.09         | 7.96     |
| Chicken Ig rearranged light-chain mRNA V-J-C region                      | CHKIGLAVD      | 10.72        | 12.12    |
| ADP-ribosylation factor-like 4C (ARL4C)                                  | XM_001237034   | 6.02         | 5.66     |
| Actin related protein 2/3 complex, subunit 5, 16kDa ARPC5)               | NM_001031561   | 10.12        | 10.58    |
| Bruton agamma globulinemia tyrosine kinase (BTK)                         | NM_204233      | 6.60         | 6.64     |
| Coiled-coil domain containing 165                                        | XM_423729      | 0            | 7.13     |
| Clusterin (CLU)                                                          | NM_204900      | 9.30         | 9.40     |
| Colony stimulating factor 1 receptor(CSF1R)                              | XM_414597      | 7.46         | 6.93     |
| Tyrosine kinase protooncogene (c-tkl)                                    | CHKTCKL        | 6.86         | 6.90     |
| Ganglioside GM2 activator-like                                           | XM_003642059   | 7.68         | 6.43     |
| Hemoglobin, gamma A (HBG1)                                               | NM_001004390   | 11.31        | 8.71     |
| Histone deacetylase 8 (HDAC8)                                            | XM_420178      | 9.96         | 10.49    |
| Hermansky-Pudlak syndrome 5 (HPS5)                                       | XM_421011      | 8.74         | 8.13     |
| Heat shock protein Hsp70 (hsp70) gene                                    | AY143692       | 9.46         | 8.55     |
| Immunoglobulin heavy chain variable region (IGVH gene)                   | AM773251       | 10.03        | -0.32    |
| Immunoglobulin heavy chain variable region (IGVH gene)                   | AM773267       | 9.56         | 5.96     |
| GTPase IMAP family member 8-like                                         | XM_418473      | 7.12         | 6.73     |



| Gene name                                                               | Accession no | Fold changes |          |
|-------------------------------------------------------------------------|--------------|--------------|----------|
|                                                                         |              | Line 6.3     | Line 7.2 |
| Integrin, alpha 4 (alpha 4 subunit of VLA-4 receptor)                   | XM_421974    | 7.55         | 7.44     |
| Integrin, beta 2 (complement component 3 receptor 3 and 4)              | NM_205251    | 8.27         | 8.54     |
| Integrin beta 3 (platelet glycoprotein IIIa, antigen CD61)              | NM_204315    | 6.57         | 4.72     |
| Janus kinase 1 (JAK1)                                                   | NM_204870    | 8.35         | 8.30     |
| Lymphocyte cytosolic protein 1 (L-plastin)                              | NM_001008440 | 9.01         | 8.88     |
| Leukocyte cell-derived chemotaxin 2                                     | NM_205478    | 7.67         | 2.04     |
| Lymphocyte-specific protein 1                                           | NM_204342    | 8.57         | 8.61     |
| 126 MRP mRNA                                                            | X61200       | 9.37         | 9.52     |
| Moesin (MSN)                                                            | XR_140102    | 8.87         | 8.83     |
| Nerve growth factor receptor                                            | NM_001146133 | 6.46         | 6.62     |
| Nucleophosmin (nucleolar phosphoprotein B23, numatrin)                  | NM_205267    | 11.14        | 11.41    |
| Protein kinase C, beta                                                  | XM_414868    | 7.43         | 7.59     |
| Ribosomal protein S6                                                    | NM_205225    | 9.81         | 10.54    |
| Septin 6 (SEPT6)                                                        | NM_001031125 | 7.98         | 8.09     |
| GB-2 T cell receptor alpha                                              | GDU04611     | 7.57         | 7.95     |
| AA2 T cell receptor beta                                                | EF554758     | 7.91         | 8.54     |
| Transmembrane protein 123 (TMEM123)                                     | NM_001006279 | 7.82         | 8.17     |
| Ig germline heavy chain VD region (VH15-9)                              | CHKIGVHAH    | 9.37         | 7.58     |
| Ig germline heavy chain VD region (VH57-1)pseudogene.                   | CHKIGVHAJ    | 9.19         | 7.26     |
| Ig germline heavy chain VD region (VH57-13)                             | CHKIGVHAR    | 7.38         | 7.53     |
| Zinc finger protein 598, transcript variant 3 (ZNF598)                  | XM_414850    | 6.96         | 7.15     |
| Gatinaise disrupted tyrosinase gene, intron 4                           | DQ118701     | 11.06        | -1.74    |
| Hemoglobin subunit alpha-A-like                                         | XM_003643191 | 11.84        | 8.53     |
| High mobility group 1 protein                                           | Y17968       | 8.76         | 8.42     |
| Hypothetical protein, clone 8j21                                        | AJ719941     | 10.66        | 10.81    |
| Ig heavy-chain gene V region                                            | CHKIGHC      | 8.72         | 7.80     |
| Ig rearranged H-chain gene V-D-J-region                                 | CHKIGHAZE    | 10.52        | 7.71     |
| Ig rearranged H-chain gene V-D-J-region                                 | CHKIGHAZE    | 12.45        | 11.15    |
| Ig rearranged heavy chain V region (VH1)                                | CHKIGVHAAK   | 8.49         | 7.94     |
| Ig rearranged lambda-chain pseudogene psi-V14 V1 region                 | CHKIGLA12    | 8.25         | 6.48     |
| Ig rearranged lambda-chain pseudogene psi-V7 V1 region                  | CHKIGLA19    | 9.45         | 7.02     |
| Immunoglobulin alpha heavy chain                                        | S40610       | 7.74         | 5.00     |
| Mitochondrial genome                                                    | X52392       | 12.53        | 12.30    |
| Ras-related protein Rab-10-like                                         | XM_419183    | 5.79         | 5.46     |
| SH2 domain-containing adapter protein E-like                            | XM_003643441 | 10.53        | 7.62     |
| T-cell-interacting, activating receptor on myeloid cells protein 1-like | XM_003644001 | 6.60         | 0        |
| T-lymphocyte surface antigen Ly-9-like                                  | XM_003642660 | 6.86         | 7.24     |
| Transmembrane 6 superfamily member 2-like                               | XM_423447    | 0            | 8.26     |
| Uncharacterized LOC415472                                               | XM_429332    | 5.85         | 6.42     |

**Supplementary Table S4.** Description of cytokine and receptor genes in the spleens of chicken lines 6.3 and 7.2 responsive to co-infection with EM/CP. The data showed significant changes in gene expression of the 53 cytokine genes and 97 cytokine receptor genes in NE-afflicted chicken lines. The genes included here showed significant differences in gene expression ( $p < 0.01$ , Log2-transformations of the normalization).

| Gene    | Full name                                         | Fold changes |          |
|---------|---------------------------------------------------|--------------|----------|
|         |                                                   | Line 6.3     | Line 7.2 |
| ADIPOQ  | Adiponectin, C1Q And Collagen                     | 8.15         | 8.41     |
| BMP2K   | BMP-2-Inducible Protein Kinase                    | 2.04         | 1.75     |
| BMPER   | BMP Binding Endothelial Regulator                 | -3.10        | -3.82    |
| CCL1    | Chemokine (C-C Motif) Ligand 1                    | -1.25        | 1.57     |
| CCL17   | Chemokine (C-C Motif) Ligand 17                   | -0.20        | -0.19    |
| CCL19   | Chemokine (C-C Motif) Ligand 19                   | -2.30        | 2.70     |
| CCL20   | Chemokine (C-C Motif) Ligand 20                   | -3.77        | -3.62    |
| CCL3    | Chemokine (C-C Motif) Ligand 3                    | 3.42         | 4.68     |
| CCL4    | Chemokine (C-C Motif) Ligand 1                    | 1.85         | 5.78     |
| CMC1    | COX Assembly Mitochondrial Protein 1 Homolog      | -0.60        | 0.32     |
| CNTF    | Ciliary Neurotrophic Factor                       | 0.93         | 3.45     |
| CXCL13  | Chemokine (C-X-C Motif) Ligand 13                 | 9.25         | 2.93     |
| CXCL14  | Chemokine (C-X-C Motif) Ligand 14                 | -2.66        | -3.95    |
| FASLG   | Fas Ligand (TNF Superfamily, Member 6)            | -1.74        | 1.95     |
| IFITM10 | Interferon Induced Transmembrane Protein 10       | 0.00         | 0.00     |
| IFNA1   | Interferon, Alpha 1                               | 1.92         | -0.59    |
| IFNB    | Interferon, Beta                                  | -2.64        | 2.62     |
| IFNG    | Interferon, Gamma                                 | -1.80        | 1.48     |
| IFNK    | Interferon, Kappa                                 | -1.57        | -1.81    |
| IL-10   | Interleukin 10                                    | 0.50         | 2.32     |
| IL-12A  | Interleukin 12A                                   | -2.81        | 0.99     |
| IL-16   | Interleukin 16                                    | 2.06         | 2.05     |
| IL-17B  | Interleukin 17B                                   | -2.57        | 0.00     |
| IL-17D  | Interleukin 17D                                   | -3.94        | -3.62    |
| IL-17F  | Interleukin 17F                                   | -3.40        | -0.61    |
| IL-19   | Interleukin 19                                    | -2.87        | 0.48     |
| IL-22   | Interleukin 22                                    | -7.48        | -5.77    |
| IL-26   | Interleukin 26                                    | -7.08        | -4.93    |
| IL-28B  | Interleukin 28B                                   | 2.98         | -0.30    |
| IL-34   | Interleukin 34                                    | 2.94         | 2.94     |
| IL-5    | Interleukin 5                                     | 0.44         | -0.04    |
| IL-6    | Interleukin 6                                     | 0.95         | 1.60     |
| IL-7    | Interleukin 7                                     | -2.73        | 2.03     |
| IL-8    | Interleukin 8                                     | -0.77        | -0.12    |
| ILF2    | Interleukin Enhancer Binding Factor 2             | 0.66         | 0.76     |
| LIF     | Leukemia Inhibitory Factor                        | -2.38        | 0.76     |
| NLRC3   | NLR Family, CARD Domain Containing 3              | -2.64        | -0.46    |
| NLRC5   | NLR Family, CARD Domain Containing 5              | -1.16        | -0.63    |
| NRG4    | Neuregulin 4                                      | -1.48        | -1.89    |
| SPP1    | Secreted Phosphoprotein 1                         | 2.50         | 0.35     |
| SPP2    | Secreted Phosphoprotein 2                         | -0.08        | 2.43     |
| TAP1    | Transporter 1, ATP-Binding Cassette, Sub-Family B | 0.11         | 1.10     |
| TAP2    | Transporter 2, ATP-Binding Cassette, Sub-Family B | 0.26         | 0.55     |
| TGFA    | Transforming Growth Factor, Alpha                 | -2.05        | -0.80    |

| Gene      | Full name                                              | Fold changes |          |
|-----------|--------------------------------------------------------|--------------|----------|
|           |                                                        | Line 6.3     | Line 7.2 |
| TGFB1     | Transforming Growth Factor, Beta 1                     | 7.34         | 7.46     |
| TNFAIP2   | Tumor Necrosis Factor, Alpha-Induced Protein 2         | 4.97         | 4.64     |
| TNFAIP3   | Tumor Necrosis Factor, Alpha-Induced Protein 3         | 2.11         | 2.53     |
| TNFAIP8   | Tumor Necrosis Factor, Alpha-Induced Protein 8         | 2.45         | 2.42     |
| TNFAIP8L1 | Tumor Necrosis Factor, Alpha-Induced Protein 8 Like 1  | 2.80         | 2.94     |
| TNFAIP8L3 | Tumor Necrosis Factor, Alpha-Induced Protein 8 Like 3  | 0.04         | 3.96     |
| TNFSF11   | Tumor Necrosis Factor (Ligand) Superfamily, Member 11  | 3.52         | 1.64     |
| TNFSF13B  | Tumor Necrosis Factor (Ligand) Superfamily, Member 13B | 6.70         | 4.69     |
| VEGFA     | Vascular Endothelial Growth Factor A                   | -4.24        | -5.06    |
| CSF2RA    | Colony Stimulating Factor 2 Receptor, Alpha            | 5.23         | 7.77     |
| CSF2RB    | Colony Stimulating Factor 2 Receptor, Beta             | 5.33         | 7.68     |
| CSF3R     | Colony Stimulating Factor 3 Receptor                   | 10.16        | 8.52     |
| CXCR3     | Chemokine (C-X-C Motif) Receptor 3                     | -8.22        | -7.88    |
| CXCR7     | Chemokine (C-X-C Motif) Receptor 7                     | 4.33         | 2.40     |
| GDF8      | Growth differentiation factor 8                        | 0.00         | 1.87     |
| IFIH1     | Interferon Induced With Helicase C Domain 1            | -1.46        | -0.16    |
| IFITM5    | Interferon Induced Transmembrane Protein 5             | -8.38        | -4.84    |
| IFNAR1    | Interferon (Alpha, Beta And Omega) Receptor 1          | 0.98         | 2.09     |
| IFNAR2    | Interferon (Alpha, Beta And Omega) Receptor 2          | 0.78         | 1.03     |
| IFNGR1    | Interferon Gamma Receptor 1                            | 1.75         | 0.95     |
| IFNGR2    | Interferon Gamma Receptor 2                            | -0.64        | 0.08     |
| IGF1R     | Insulin-Like Growth Factor 1 Receptor                  | 1.53         | 1.43     |
| IL-11RA   | Interleukin 11 Receptor, Alpha                         | 0.92         | -3.29    |
| IL-12RB1  | Interleukin 12 Receptor, Beta 1                        | 1.91         | 0.84     |
| IL-12RB2  | Interleukin 12 Receptor, Beta 2                        | 0.89         | 1.32     |
| IL-13RA1  | Interleukin 13 Receptor, Alpha 1                       | -2.86        | -1.92    |
| IL-17RA   | Interleukin 17 Receptor, Alpha                         | 2.39         | 2.08     |
| IL-17RC   | Interleukin 17 Receptor C                              | -4.96        | -5.02    |
| IL-17RD   | Interleukin 17 Receptor D                              | -1.25        | -2.70    |
| IL-17REL  | Interleukin 17 Receptor E-Like                         | 1.58         | 4.28     |
| IL-18R1   | Interleukin 18 Receptor 1                              | 5.88         | 5.01     |
| IL-18RAP  | Interleukin 18 Receptor Accessory Protein              | 6.13         | 3.11     |
| IL-1R1    | Interleukin 1 Receptor 1                               | 6.49         | 1.97     |
| IL-1R2    | Interleukin 1 Receptor 2                               | 3.55         | 7.91     |
| IL-1RAP   | Interleukin 1 Receptor Accessory Protein               | 6.63         | 5.81     |
| IL-1RAPL2 | Interleukin 1 Receptor Accessory Protein-Like 2        | -5.00        | -4.99    |
| IL-1RL1   | Interleukin 1 Receptor-Like 1                          | 2.82         | 6.98     |
| IL-1RL2   | Interleukin 1 Receptor-Like 2                          | 4.46         | -0.07    |
| IL-20RA   | Interleukin 20 Receptor, Alpha                         | 2.48         | 3.59     |
| IL-20RB   | Interleukin 20 Receptor, Beta                          | 1.53         | 2.23     |
| IL-21R    | Interleukin 21 Receptor                                | 3.04         | 3.49     |
| IL-22RA1  | Interleukin 22 Receptor, Alpha 1                       | -10.08       | -9.12    |
| IL-22RA2  | Interleukin 22 Receptor, Alpha 2                       | -2.11        | -2.43    |
| IL-23R    | Interleukin 23 Receptor                                | 1.71         | -0.34    |
| IL-28RA   | Interleukin 28 Receptor, Alpha                         | -1.43        | -1.03    |
| IL-2RB    | Interleukin 2 Receptor, Beta                           | 2.20         | 1.54     |
| IL-2RG    | Interleukin 2 Receptor, Gamma                          | 3.56         | 3.58     |
| IL-31RA   | Interleukin 31 Receptor, Alpha                         | 6.40         | 4.78     |
| IL-4I1    | Interleukin 4 Induced 1                                | 2.23         | 3.92     |
| IL-4R     | Interleukin 4 Receptor                                 | 1.71         | 1.64     |

| Gene      | Full name                                                      | Fold changes |          |
|-----------|----------------------------------------------------------------|--------------|----------|
|           |                                                                | Line 6.3     | Line 7.2 |
| IL-5RA    | Interleukin 5 Receptor, Alpha                                  | 7.26         | 1.22     |
| IL-6ST    | Interleukin 6 Signal Transducer                                | 6.02         | 5.67     |
| IL-7R     | Interleukin 7 Receptor                                         | 10.67        | 8.23     |
| IL-9R     | Interleukin 9 Receptor                                         | 5.31         | 4.90     |
| ILDR1     | Immunoglobulin-Like Domain Containing Receptor 1               | -3.04        | -2.78    |
| ILDR2     | Immunoglobulin-Like Domain Containing Receptor 2               | 1.54         | 2.60     |
| ILF3      | Interleukin Enhancer Binding Factor 3                          | 1.02         | 1.22     |
| LEPRE1    | Leucine Proline-Enriched Proteoglycan (Leprecan) 1             | 1.31         | 1.73     |
| LEPREL1   | Leprecan-Like 1                                                | 3.61         | -2.15    |
| LEPREL2   | Leprecan-Like 2                                                | -0.86        | -3.41    |
| LEPREL4   | Leprecan-Like 4                                                | -0.24        | 0.52     |
| LEPROTL1  | Leptin Receptor Overlapping Transcript-Like 1                  | 0.51         | 1.34     |
| LIFR      | Leukemia Inhibitory Factor Receptor Alpha                      | 2.72         | 3.66     |
| LILRA2    | Leukocyte Immunoglobulin-Like Receptor, Subfamily A, Member 2  | 5.09         | 1.75     |
| LILRA4    | Leukocyte Immunoglobulin-Like Receptor, Subfamily A, Member 4  | 0.82         | -0.54    |
| LILRA5    | Leukocyte Immunoglobulin-Like Receptor, Subfamily A, Member 5  | -2.17        | -2.14    |
| LILRA6    | Leukocyte Immunoglobulin-Like Receptor, Subfamily A, Member 6  | 4.99         | 0.00     |
| LILRB1    | Leukocyte Immunoglobulin-Like Receptor, Subfamily B, Member 1  | 2.47         | 4.64     |
| LILRB3    | Leukocyte Immunoglobulin-Like Receptor, Subfamily B, Member 3  | 5.49         | 0.58     |
| LILRB4    | Leukocyte Immunoglobulin-Like Receptor, Subfamily B, Member 4  | 3.24         | 2.52     |
| LILRB5    | Leukocyte Immunoglobulin-Like Receptor, Subfamily B, Member 5  | 4.31         | 3.65     |
| LTB4R     | Leukotriene B4 Receptor                                        | 7.16         | 7.33     |
| LTBP1     | Latent Transforming Growth Factor Beta Binding Protein 1       | 1.65         | 1.75     |
| LTBP2     | Latent Transforming Growth Factor Beta Binding Protein 2       | -3.63        | -3.18    |
| MC1R      | Melanocortin 1 Receptor                                        | 0.00         | -2.65    |
| NRG2      | Neuregulin 2                                                   | -0.09        | -4.76    |
| NRG3      | Neuregulin 3                                                   | 0.38         | 0.00     |
| PDGFC     | Platelet Derived Growth Factor C                               | 1.79         | -1.03    |
| PDGFD     | Platelet Derived Growth Factor D                               | -2.19        | 2.30     |
| PDGFRL    | Platelet-Derived Growth Factor Receptor, Alpha Polypeptide     | -4.61        | -0.03    |
| TGFBR2    | Transforming Growth Factor, Beta Receptor II                   | 2.18         | 0.96     |
| TGFBRAP1  | Transforming Growth Factor, Beta Receptor Associated Protein 1 | 1.22         | 0.40     |
| TGFBR1    | Transforming Growth Factor, Beta Receptor I                    | 3.91         | 3.41     |
| TLR1      | Toll-Like Receptor 1                                           | 3.34         | 4.11     |
| TLR15     | Toll-Like Receptor 15                                          | 5.30         | 8.26     |
| TLR21     | Toll-Like Receptor 21                                          | 4.32         | 2.23     |
| TLR5      | Toll-Like Receptor 5                                           | 2.28         | -0.47    |
| TLR6      | Toll-Like Receptor 6                                           | 3.82         | 5.46     |
| TLR7      | Toll-Like Receptor 7                                           | 8.04         | 7.08     |
| TNFRSF11A | Tumor Necrosis Factor Receptor Superfamily, Member 11a,        | -0.88        | -1.59    |
| TNFRSF11B | Tumor Necrosis Factor Receptor Superfamily, Member 11b         | -0.19        | -1.00    |
| TNFRSF13B | Tumor Necrosis Factor Receptor Superfamily, Member 13B         | 4.04         | 5.59     |
| TNFRSF13C | Tumor Necrosis Factor Receptor Superfamily, Member 13C         | 6.73         | 7.94     |
| TNFRSF14  | Tumor Necrosis Factor Receptor Superfamily, Member 14          | -4.47        | -3.48    |
| TNFRSF18  | Tumor Necrosis Factor Receptor Superfamily, Member 18          | 1.28         | 1.84     |
| TNFRSF1B  | Tumor Necrosis Factor Receptor Superfamily, Member 1B          | 4.61         | 5.83     |
| TNFRSF21  | Tumor Necrosis Factor Receptor Superfamily, Member 21          | 0.90         | 1.75     |
| TNFRSF25  | Tumor Necrosis Factor Receptor Superfamily, Member 25          | 2.80         | 1.92     |
| TNFRSF4   | Tumor Necrosis Factor Receptor Superfamily, Member 4           | -1.20        | -1.20    |
| TNFRSF6B  | Tumor Necrosis Factor Receptor Superfamily, Member 6B          | -6.36        | -0.46    |

| Gene    | Full name                                            | Fold changes |          |
|---------|------------------------------------------------------|--------------|----------|
|         |                                                      | Line 6.3     | Line 7.2 |
| TNFRSF9 | Tumor Necrosis Factor Receptor Superfamily, Member 9 | 1.63         | 1.98     |
| TRAT1   | T Cell Receptor Associated Transmembrane Adaptor 1   | 4.37         | 5.10     |
| TRDC    | T Cell Receptor Delta Constant                       | 2.43         | 2.14     |
| TRGC1   | T Cell Receptor Gamma Constant 1                     | 1.69         | 1.84     |
| XCR1    | Chemokine (C Motif) Receptor 1                       | 6.65         | 6.25     |

**Supplementary Table S5.** Description of CD molecular genes responsive to NE- affliction in the spleen of the two chicken lines. The data showed significant changes in the gene expression of 44 CD molecular genes in the two NE-afflicted chicken lines. The genes included here showed significant differences in gene expression ( $p < 0.01$ , Log<sub>2</sub>-transformations of the normalization).

| Symbols  | Full gene name                                 | Fold changes |          |
|----------|------------------------------------------------|--------------|----------|
|          |                                                | Line 6.3     | Line 7.2 |
| CD2      | CD2 Molecule                                   | 6.03         | 5.02     |
| CD200    | CD200 Molecule                                 | 5.62         | 6.03     |
| CD200R1  | CD200 Molecule receptor 1                      | 1.14         | -1.06    |
| CD200R1A | CD200 Molecule receptor 1 Like                 | 4.38         | 3.75     |
| CD226    | CD226 Molecule                                 | 1.42         | 0.65     |
| CD244    | CD244 Molecule                                 | 2.12         | 1.51     |
| CD247    | CD247 Molecule                                 | 2.71         | 3.27     |
| CD274    | CD274 Molecule                                 | -0.13        | 2.54     |
| CD276    | CD276 Molecule                                 | -0.09        | 0.73     |
| CD28     | CD28 Molecule                                  | 4.34         | 3.31     |
| CD2AP    | CD2 Molecule Associated Protein                | -1.51        | -1.50    |
| CD300A   | CD300A Molecule                                | 1.38         | 1.69     |
| CD300C   | CD300C Molecule                                | 1.86         | 1.05     |
| CD300LF  | CD300 molecule-like family member f            | 0.00         | 0.00     |
| CD34     | CD34 Molecule                                  | -2.94        | -1.18    |
| CD36     | CD36 Molecule                                  | 4.28         | -5.01    |
| CD38     | CD38 Molecule                                  | 2.89         | 3.32     |
| CD3D     | T-Cell Surface Glycoprotein CD3 Delta          | 1.32         | 1.61     |
| CD3E     | T-Cell Surface Glycoprotein CD3 Epsilon        | 2.10         | 2.08     |
| CD4      | CD4 Molecule                                   | 5.86         | 6.15     |
| CD40     | CD40 Molecule                                  | 4.43         | 3.23     |
| CD40L    | CD40 Molecule Ligand                           | 2.88         | 2.57     |
| CD44     | CD44 Molecule                                  | 3.49         | 3.69     |
| CD5      | CD5 Molecule                                   | 3.74         | 4.56     |
| CD55     | CD55 Molecule                                  | -1.03        | -1.15    |
| CD59     | CD59 Molecule                                  | 4.78         | 2.70     |
| CD5L     | CD5 Molecule-Like                              | 3.25         | 3.31     |
| CD69     | CD69 Molecule                                  | 2.30         | 2.15     |
| CD7      | CD7 Molecule                                   | -2.18        | -0.62    |
| CD72     | CD72 Molecule                                  | 6.10         | 8.48     |
| CD79B    | CD79b molecule, immunoglobulin-associated beta | 6.62         | 8.14     |
| CD80     | CD80 Molecule                                  | 1.37         | 1.70     |
| CD8A     | CD8a Molecule                                  | -4.90        | -1.56    |
| CD93     | CD93 Molecule                                  | 8.42         | 3.25     |
| CD99     | CD99 Molecule                                  | -0.39        | -0.46    |
| CD99L2   | CD99 molecule-like 2                           | 0.99         | -1.03    |
| CD101    | CD101 Molecule                                 | -0.70        | -1.60    |
| CD109    | CD109 Molecule                                 | 1.48         | -0.62    |
| CD14     | CD14 Molecule                                  | 4.30         | 3.89     |

| <b>Symbols</b> | <b>Full gene name</b> | <b>Fold changes</b> |                 |
|----------------|-----------------------|---------------------|-----------------|
|                |                       | <b>Line 6.3</b>     | <b>Line 7.2</b> |
| CD163          | CD163 Molecule        | -8.26               | -6.88           |
| CD163L1        | CD163 Molecule Like 1 | 4.20                | 1.28            |
| CD180          | CD180 Molecule        | 6.53                | 8.70            |
| CD48           | CD48 Molecule         | -0.81               | 2.34            |
| CD83           | CD83 Molecule         | 3.95                | 4.69            |

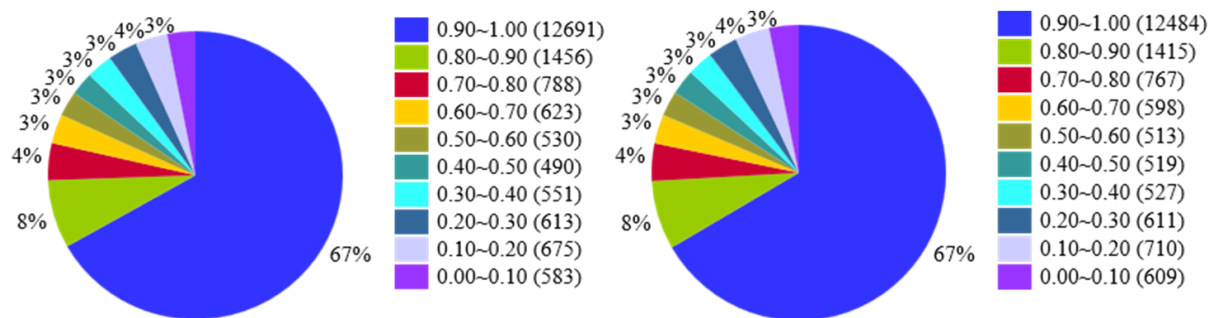

Distribution of Genes' Coverage in NE samples of line 6.3

Distribution of Genes' Coverage in NE samples of line 7.2

**Supplementary Figure S1.** Percent of coverage representing the percentage of genes expressed in the spleen of the two chicken lines. The distribution of distinct reads over different read abundance categories showed similar patterns for both RNA-Seq libraries. The similarity distribution displayed a comparable pattern with approximately 73% of the sequences having a similarity of 80%, while approximately 27% of the hits had a similar range in the spleen of lines 6.3 and 7.2.



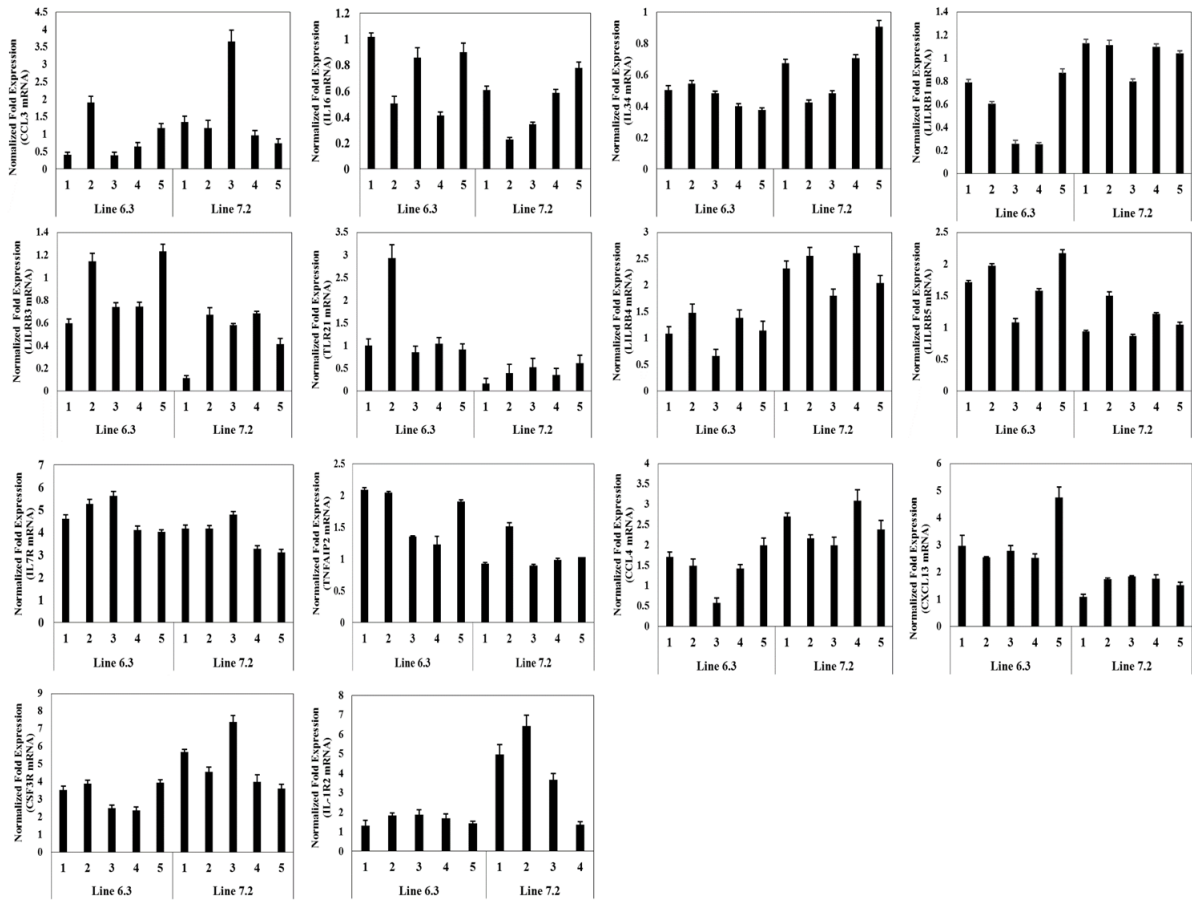

**Supplementary Figure S2.** Normalized fold expression of cytokine genes in the spleen of individuals of the two genetically disparate lines (Line 6.3 and Line 7.2, control=1). Chickens were orally infected with  $1.0 \times 10^4$  oocysts of *E.maxima* on day 14 followed by infection with *C.perfringens* at  $1.0 \times 10^9$  CFU 4 days later. Spleens were isolated from 2-day post *C.P.* infected chickens, and transcriptional levels were determined by quantitative RT-PCR.
